1 **Manuscript draft**

2

3 **Longitudinal assessment of water-reaching reveals altered cortical**  
4 **activity and fine motor coordination defects in a Huntington Disease**  
5 **model**

6

7 **Abbreviated title:** *Water-reaching phenotyping of Huntington Disease*

8

9 Yundi Wang, Marja D. Sepers, Dongsheng Xiao, Lynn A. Raymond\* and Timothy H. Murphy\*

10

11 <sup>1</sup> University of British Columbia, Department of Psychiatry, Kinsmen Laboratory of  
12 Neurological Research, Detwiller Pavilion, 2255 Wesbrook Mall, Vancouver, V6T 1Z3, British  
13 Columbia, Canada, <sup>2</sup> Djavad Mowafaghian Centre for Brain Health, 2215 Wesbrook Mall,  
14 University of British Columbia, Vancouver, V6T 1Z3, British Columbia, Canada

15

16 \*Correspondence to either: Timothy H. Murphy or Lynn A. Raymond  
17 Address: 5609-2215 Wesbrook Mall, Vancouver, B.C. V6T 1Z3, Canada  
18 E-mail: [timothy.murphy@ubc.ca](mailto:timothy.murphy@ubc.ca) or [lynn.raymond@ubc.ca](mailto:lynn.raymond@ubc.ca)

19

20

21

Number of Pages: 42

Words in Abstract: 244

Number of Figures: 8 main (9 extended data)

Words in Significance Statement: 114

Number of Tables: 0

Words in Introduction: 568

Number of Multimedia: 2

Words in Discussion: 1319

Number of 3D Models: 0

22

23 **Keywords:** Huntington Disease, mesoscale, calcium imaging, water-reaching, cortex, mouse

24

25

26

## 27 **Abstract**

28 Huntington Disease (HD), caused by dominantly inherited expansions of a CAG repeat results in  
29 characteristic motor dysfunction. Although gross motor and balance defects have been extensively  
30 characterized in multiple HD mouse models using tasks such as rotarod, beam walking and gait  
31 analysis, little is known about forelimb deficits. Here we use a high-throughput alternating  
32 reward/non-reward water-reaching task conducted daily over ~2 months to simultaneously  
33 monitor forelimb impairment and mesoscale cortical changes in GCaMP activity, comparing  
34 female zQ175 (HD) and wildtype (WT) littermate mice, starting at ~5.5 months of age. Behavioral  
35 analysis of the water-reaching task reveals that HD mice, despite learning the water-reaching task  
36 as proficiently as WT mice, take longer to learn the alternating event sequence. Although WT mice  
37 displayed no significant changes in cortical activity and reaching trajectory throughout the testing  
38 period, HD mice exhibited an increase in cortical activity – especially in the secondary motor and  
39 retrosplenial cortices – over time, as well as longer and more variable reaching trajectories by ~7  
40 months of age. HD mice also experienced a progressive reduction in successful performance rates.  
41 Tapered beam and rotarod tests before and/or after water-reaching assessment confirmed these  
42 early and manifest stages of HD characterized by the absence and presence of failed water-reaching  
43 trials, respectively. Reduced DARPP-32 (marker for striatal medium spiny neurons) expression in  
44 HD mice further confirmed disease pathology. The water-reaching task can be used to inform HD  
45 and potentially other movement disorder onset, therapeutic intervention windows and test drug  
46 efficacy.

47

48

## 49 **Significance statement**

50 The movement disorder, Huntington Disease (HD), has been extensively studied in preclinical  
51 settings using mouse models of disease examining gross motor and balance defects. Little  
52 however, is known regarding forelimb deficits and underlying cortical circuit changes. Using a  
53 high-throughput alternating reward/non-reward water-reaching task, we characterized early event  
54 sequence learning defects in HD mice aged ~5.5 months. Progressive forelimb movement defects  
55 first become apparent at ~6.5 months of age with corresponding increases in cortical activity  
56 associated with reaching observed over time. These forelimb defects revealed in the water-  
57 reaching task are coincident with gross motor defects characterized using the tapered beam and  
58 rotarod tasks, demonstrating the suitability of the water-reaching task in phenotyping HD motor  
59 deficits.

## 60 **Introduction**

61 Synaptic and circuit changes that precede progressive striatal medium spiny neuron (MSN) and  
62 cortical neuronal loss, in the case of Huntington Disease (HD) results in a characteristic triad of  
63 symptoms: motor dysfunction, cognitive impairment, and neuropsychiatric symptoms (McColgan  
64 and Tabrizi, 2018; Cepeda and Levine, 2022). These hallmark motor symptoms of HD include fine  
65 motor incoordination, chorea, bradykinesia, rigidity and difficulties with balance and gait.

66 Since the discovery that dominantly inherited expansions  $>39$  of a CAG triplet repeat in exon 1 of  
67 the *HTT* gene causes HD (MacDonald et al., 1993), over 50 distinct mouse and rat models with  
68 increasingly better face and construct validity have been developed (Pouladi et al., 2013; Menalled  
69 et al., 2014). Although several assessments such as rotarod, balance beam and gait tasks (such as

70 the footprint test) are commonly used to assess motor defects in HD mice (Pallier et al., 2009;  
71 Brooks et al., 2012; Abada et al., 2013; Southwell et al., 2016), bodyweight remains a major  
72 confound of these tasks (McFadyen et al., 2003; Batka et al., 2014) necessitating the development  
73 and usage of other behavioral assessments.

74 In clinical settings, impairments in reaching and/or skilled hand movements have been observed  
75 in HD patients (Klein et al., 2011). Skilled forelimb movement learning and performance also has  
76 been examined in HD mice using automated home-cage lever pulling systems (Woodard et al.,  
77 2017, 2021), demonstrating that HD motor learning deficits are related to impaired striatal  
78 neuronal plasticity (Woodard et al., 2021). Given reaching towards a target and manipulating  
79 objects is commonly used in our daily lives and the general ‘reach-to-grasp’ features of forelimb  
80 movements has been shown to be similar between humans and rodents (Galiñanes et al., 2018),  
81 preclinical behavioral assessment of skilled forelimb reaching tasks could improve our  
82 understanding of HD movement defects. Water-reaching tasks further enable longitudinal multi-  
83 trial assessment providing a high throughput system for behavioral phenotyping throughout the  
84 duration of disease progression, and may detect more subtle motor learning and movement  
85 defects. Combining water-reaching assessment with simultaneous recording of widefield cortical  
86 activity further enables examination of pathophysiological circuit changes underlying HD  
87 movement defects.

88 To date, few studies exist examining these wide-scale cortical circuit changes in HD mouse  
89 models. Using 3D magnetic resonance imaging, arteriolar cerebral blood volume level changes in  
90 the striatum and motor cortex were observed in HD mice beginning at 3 months of age which  
91 worsened overtime (Liu et al., 2021). Hemodynamic measurements are, however, indirect

92 indicators of neuronal activity. Using mesoscale voltage-sensitive dye imaging, our group has  
93 shown that hindlimb stimulation evokes a larger area and longer lasting cortical response in  
94 anesthetized HD compared to WT mice (Sepers et al., 2021). Given recent neurophysiology studies  
95 have demonstrated the involvement of multiple brain regions in sensation, cognition and  
96 movement (Pinto et al., 2019; Steinmetz et al., 2019), widefield functional assessment of neuronal  
97 circuit changes during task performance is needed throughout the time course of HD disease  
98 pathology.

99 In this study, we used a water-reaching task to demonstrate progressive changes in widefield  
100 cortical activity and skilled forelimb movement defects. Motor deficits in the water-reaching task  
101 correlated with stage-dependent deficits on tapered beam and rotarod tests as well as post-hoc  
102 immunohistochemistry staining for striatal MSNs. The full-length *HTT* knock-in heterozygous  
103 zQ175 mouse model was employed due to its advantage of having a relatively slow disease  
104 development and greater construct validity over other HD mouse models (e.g. R6/1, R6/2 and  
105 BACHD)(Pouladi et al., 2013).

## 106 **Methods**

### 107 Animals

108 All experiments and procedures were carried out in accordance with the Canadian Council on  
109 Animal Care and approved by the University of British Columbia Committee on Animal Care  
110 (protocols A18-0036 and A19-0076). Mice were group housed with 2 to 4 mice per cage under a  
111 controlled 12 hr light/dark cycle (7:00 lights on, 19:00 lights off). Standard laboratory mouse diet  
112 was available *ad libitum*. Water was available *ad libitum* except during the duration of head-fixed

113 water-reaching behavioral testing and when mice were readjusted to *ad libitum* water consumption.  
114 Surgery and subsequent behavioral testing was performed on 6 female heterozygous zQ175 knock-  
115 in C57BL/6 mice expressing GCaMP6s and 6 female wildtype (WT) littermates as controls starting  
116 at ~5 months of age. zQ175 C57BL/6 mice and WT littermates, both expressing GCaMP6s, were  
117 obtained by first crossing heterozygous zQ175 C57BL/6 mice (<https://www.jax.org/strain/029928>)  
118 with homozygous transgenic Thy-1 GCaMP6s line 4.3 C57BL/6 mice (HHMI Janelia Research  
119 Campus)(Dana et al., 2014; Sofroniew et al., 2016) then crossing subsequent offspring to obtain  
120 homozygous GCaMP6s expression. Animal tissue was collected through ear clipping at weaning.  
121 DNA extraction and PCR analysis were subsequently used to determine genotype. Health status  
122 and weight of all animals was assessed daily.

### 123 Animal surgery

124 All mice were subjected to head-bar and chronic transcranial window surgery as previously  
125 described (Murphy et al., 2016; Silasi et al., 2016) and allowed to recover for a week before  
126 commencement of behavioral testing. Briefly, an incision and skin retraction over the cortex was  
127 made enabling a glass coverslip to be applied using Metabond clear dental cement (Parkell,  
128 Edgewood, NY, USA; Product: C&B Metabond) onto un-thinned bone. A steel head-fixation bar  
129 was also placed 4 mm posterior between bregma and the bar edge.

### 130 Behavioral testing timeline

131 During the handling period, mice were first habituated to daily human contact for three weeks.  
132 Mice then underwent surgery and were allowed to recover for one week before initial tapered beam  
133 assessment (5 days). After 2 days of initial tapered beam testing, mice were also habituated to first

134 the confinement tube only, then to the confinement tube and head fixation and, finally the  
135 confinement tube, head fixation and experimental setup. The duration of head fixation was  
136 progressively increased at a rate of ~7 min/day for 5 days.

137 Mice were then water restricted for skilled forelimb head-fixed water-reaching behavioral training  
138 and testing. From the water-reaching task, mice had the potential to receive ~1 mL/day of water.  
139 Given variation in weight due to *ad libitum* food consumption and excrement, mice who either  
140 performed poorly or lost more than 0.5 g in weight compared to the previous day were given up to  
141 ~1.1 mL of task-independent water. All mice received ~100  $\mu$ L of additional water daily. As such,  
142 all mice received ~1.1  $\mu$ L of task-independent and/or behavioral test-derived water daily. The  
143 humane endpoint was defined as a maximal weight loss of 15% from a pre-water-restricted  
144 baseline weight. No mice reached the humane endpoint during the duration of the study.

145 After a maximum of 67 days of water restriction and water-reaching behavioral training and  
146 testing, mice were readjusted to *ad libitum* access to water. During this readjustment period, mice  
147 received 1.1 mL of task-independent water on the first day. In subsequent days mice received  
148 progressively increased water at a rate of ~500  $\mu$ L/day for ~4 days. This additional water was  
149 administered at three different times during the light cycle to prevent water intoxication. After  
150 stabilization of mouse weight, *ad libitum* access to water was restored for the duration of the  
151 behavioral testing.

152 Accelerating rotarod (4 days) and final tapered beam testing (7 days) was then conducted with a 1  
153 day recovery period between the two behavior assessments. All animals were sacrificed with  
154 intraperitoneal injection of pentobarbital sodium (240 mg/kg) and transcardially perfused with first

155 10 mL phosphate-buffered saline (PBS) then 10 mL 10% neutral buffered formalin (NBF). Whole  
156 brains were removed and post-fixed in NBF for post-mortem immunohistochemistry.

### 157 Head-fixed water-reaching test

158 Mice underwent head-bar and chronic transcranial surgery and were trained to reach for water  
159 under head-fixed conditions following in part a previously described protocol (Galiñanes et al.,  
160 2018). All mice were water restricted after habituation to the confinement tube, head-fixation and  
161 experimental set up. A platform which extends 1.5 cm from the base of the confinement tube  
162 allowed the mice to rest their forepaws while not reaching for water. The water spout was  
163 fashioned using a blunted 22G needle bent at a 90° angle. The starting position of the water spout  
164 was ~0.75-1 cm posterior from the tip of the snout and positioned laterally so that the water drop  
165 made minimal contact with the whiskers. At this position, mice could touch the water spout with  
166 their paws and feel the water drop if they groomed which transitioned to reaching. For mice which  
167 did not groom, the water drop was allowed to touch their whisker pad which promoted grooming  
168 and transition into reaching toward the spout. Once mice started reaching, the distance of the water  
169 spout was gradually increased until a final distance of ~1.5 cm lateral and ~0.5 cm posterior to the  
170 tip of the snout was achieved. Only mice that reached the final distance with a success rate of at  
171 least ~80% on Day 15 were included for further analysis.

172 Trial structure included alternating reward and no reward trials. Unless an electronic failure  
173 occurred, all trials started with a rewarded trial. The experimental setup was illuminated with  
174 infrared LED illuminator lights. A Raspberry Pi single-board computer and custom Python script  
175 was used to control camera recording, blue and green light used to illuminate the cortex, cue light



176 signal, cue buzzer signal, water solenoid to deliver the water reward and capacitive touch sensor  
177 connected to the water spout.

178 At the start of reward and no reward trials, a Raspberry Pi infrared night vision camera (320 x 320  
179 pixels; 60 Hz) and a 1M60 Pantera CCD camera (Dalsa) enabled behavioral and GCaMP activity  
180 recording, respectively. The cortex was illuminated using alternating green and blue light  
181 providing information about hemodynamic changes and exciting GCaMP, respectively and  
182 collected as 12-bit images through the Dalsa camera using XCAP imaging software (120 Hz).  
183 Binning camera pixels (8 x 8) produced a resolution of 68  $\mu\text{m}/\text{pixel}$ . These imaging parameters  
184 have been used previously for widefield cortical GCaMP imaging (Vanni and Murphy, 2014; Xiao  
185 et al., 2017).

186 A 0.1 s duration green LED light flash 2 s after the start of camera recording was followed by a  
187 0.1 s buzzer tone in the case of non-rewarded trials or a buzzer tone combined with simultaneous  
188  $\sim 20 \mu\text{L}$  water reward in the case of rewarded trials 6 s after the start of camera recording. For  
189 rewarded trials, if a spout touch was detected by the capacitive touch sensor (Adafruit Industries,  
190 New York, NY, USA) after delivery of the water reward, the Picamera and Dalsa camera recording  
191 would cease 4 s after the time of spout touch. If a touch was not detected or it was a non-rewarded  
192 trial, camera recording would cease 10 s after delivery of the reward. Rewarded trials therefore  
193 ranged from 10-16 s and non-rewarded trials were 16 s in length. The intertrial interval was 4 s. A  
194 total of  $\sim 120$  trials over a duration of  $\sim 39$  min were conducted daily for a maximum of  $\sim 67$  days.

195 Since the capacitive touch sensor was found to not accurately determine reaches, touches and/or  
196 contact with the water spout, all trials were manually blind scored with 6 categories for rewarded  
197 trials (disregard trial, no reach, groom, success, partial fail and complete fail) and 3 categories for

198 non-rewarded trials (disregard trial, no reach and unrewarded reach). Trials which were  
199 disregarded included trials where there was either an electronic failure (e.g. water solenoid  
200 delivered too much or too little water, truncated behavioral and/or cortical activity imaging video  
201 was recorded, etc.), experimenter intervention (e.g. during training, after the animal would cause  
202 the position of the water spout to move due to vigorous grooming/reaching, etc.) or when the trial  
203 was deemed too difficult to score. No reach trials referred to those wherein the mouse did not  
204 groom or lift either both or one paw off of the resting platform in a forward reaching motion.  
205 Groom trials referred to the mouse engaging in natural grooming behavior. Complete fail trials  
206 consisted of the mouse reaching forward but being unable to make contact with or obtain the water  
207 drop. Partial fail trials consisted of the mouse reaching forward and making contact with the water  
208 drop but then being unable to bring the water to its mouth to drink. No rewarded trials scored with  
209 the category ‘unrewarded reach’ referred to either the animal engaging in grooming behavior or  
210 reaching behavior even when no water was present on the water spout. Grooming behavior was  
211 included in this category to reduce scoring subjectivity between natural grooming behavior and  
212 groom-to-reach behavior. Mice were also observed to switch between grooming and reaching the  
213 spout.

#### 214 Accelerating rotarod test

215 Mice were tested as previously described (Woodard et al., 2021). Briefly, mice were tested for 4  
216 consecutive days on the rotarod (Ugo Basille) accelerated from 5 to 40 RPM over a total time  
217 period of 300 s. Mice received 3 trials per day with a 2 hr inter-trial interval (ITI). A fall was  
218 defined as the mouse falling from the rotarod or completing a rotation holding onto the rod and  
219 not trying to right itself at any point during the rotation. If a fall or full rotation occurred, the trial

220 was ended and the time recorded. Mice that reached the maximum allowed time were scored as  
221 300 s and the trial ended. The average latency to fall for the 3 trials was scored.

## 222 Tapered beam test

223 Mice were tested using an automated touch sensing tapered beam test (Ardesch et al., 2017).  
224 Briefly, conductive paint surfaces serving as input electrodes to four 12-channel capacitive touch  
225 sensors (Adafruit Industries, New York, NY, USA) connected to a Raspberry Pi single-board  
226 computer recorded the start and finish times to traverse the beam using a custom Python script.  
227 The beam measured 100 cm in length tapering from 3.5 cm to 0.5 cm with a wider 1 cm base  
228 component extending to the left and right 1 cm below the upper surface of the beam. Mice received  
229 4 trials per day for 5 and 7 consecutive days during the first and second round of tapered beam  
230 testing. Average time required to traverse the beam across the 4 trials was scored.

## 231 Immunohistochemistry

232 Coronal brain sections were cut on a vibratome at 50  $\mu$ m thickness (Leica VT1000S, Leica  
233 microsystems GmbH). Slides were then boiled in sodium citrate (10 mM sodium citrate, 0.05%  
234 Tween20, pH 6) to allow antigen retrieval. After washing, slices were permeabilized with 0.3%  
235 Triton X-100, blocked with BlockAid Blocking Solution (Molecular Probes) and Image-iT FX  
236 Signal Enhancer (Molecular Probes) before 1:100 primary antibody labeling overnight (rabbit  
237 monoclonal anti-DARPP32 (Abcam; ab40801) and mouse anti-NeuN (MilliporeSigma;  
238 ZMS377)). Phosphate-buffered saline, 0.1% Tween 20 (PBST) washing was then followed by  
239 1:1000 secondary antibody labeling (rhodamine (TRITC) AffiniPure goat anti-mouse IgG(H+L)  
240 (JacksonImmuno Research Laboratories Inc.; 115-025-003) and AlexaFluor<sup>TM</sup>647-R-

241 phycoerythrin goat anti-rabbit IgG(H+L) (A20991,Thermo Fisher)). Sections were washed with  
242 PBST and mounted on glass coverslips with Prolong™ Gold Antifade Mountant (Thermo Fisher;  
243 P36930) for subsequent imaging. Sections were imaged with a 10x and 63x objective using an up-  
244 right Leica imaging system (SP8 DIVE). Staining intensity was determined using ImageJ software.  
245 Relative intensity values are expressed relative to background.

#### 246 Kinematic and mesoscale GCaMP analysis

247 To accommodate for varying rewarded trial lengths, the first 10 s were examined for all rewarded  
248 and non-rewarded trials.

249 *Kinematic analysis of forelimb skilled reaching behavior* DeepLabcut as described in (Mathis et  
250 al., 2018) was used to track body parts (right and left forepaws and mouth) and equipment  
251 landmarks of interest (platform and spout). Subsequent analyses were conducted using a custom  
252 Matlab code. The distance from the height of the platform to the height of the spout was calculated  
253 and represents the distance to the spout (spout distance). The euclidean distance of the left paw  
254 trajectories was calculated from the time of water reward delivery to 1.1 s afterwards for all  
255 successful rewarded trials. This time period was selected since it corresponded to the time needed  
256 to complete a successful reach. Euclidean distances traveled by the left paw were then binned.  
257 Histogram bin size reflects multiples of spout distance. For example, bin 4 contains successful  
258 rewarded trials where the euclidean distances of the left paw trajectories were 4x that of the spout  
259 distance. Euclidean distances are reported as multiples of spout distance since this distance  
260 represents the most efficient route the left paw could take to reach the spout. The average euclidean  
261 distance and standard deviation were calculated for each mouse then genotype averaged.

262 *GCaMP image processing and analysis* All GCaMP image processing and analysis were  
263 conducted using custom Matlab codes. All GCaMP responses were movement and hemodynamic  
264 artifact corrected by subtracting changes in green reflectance signals from observed green epi-  
265 fluorescence (Vanni et al., 2017) and expressed as percentages relative to baseline responses ( $F_0/F_0$ )\*100 where  $F_0$  is the baseline from the start of the trial to water reward delivery. For region-  
266 based analysis, the brain-to-atlas approach in MesoNet (Xiao et al., 2021) was used to register  
267 cortical images to a common atlas using predicted cortical landmarks to determine regions of  
268 interest (ROIs). A 5 x 5 pixel region centered in each ROI was used for examination of peak  
269 amplitude and baseline standard deviation. Peak amplitude was calculated from the baseline  
270 (defined as 1-5 s from the start of the trial) to the peak. Cortical area activated was determined as  
271 pixel intensities greater than 4x standard deviation of the baseline (1-5 s). Contralateral (right) and  
272 ipsilateral (left) hemisphere ROIs include the primary motor (M1), secondary motor (M2),  
273 somatosensory mouth (sspm), somatosensory forelimb (sspfl), somatosensory hindlimb (ssphl),  
274 somatosensory area unassigned (sspun), somatosensory nose (sspnl), somatosensory barrel field  
275 domain (sspbfd), somatosensory trunk (ssptr), primary visual (visp), retrosplenial lateral agranular  
276 part (rspagl) and retrosplenial dorsal (rspd) cortices. Examination of the  $\Delta F/F$  standard deviation  
277 during time windows before the visual cue and reward revealed no differences between genotypes  
278 (data not shown). As such, subsequent analysis was concentrated during the time period after the  
279 water reward (until 4 s afterwards).

### 281 Experimental design, statistical analysis and code accessibility

282 All experimenters were blinded during the analysis. Unless otherwise stated, Two-way Anova and  
283 Šídák's multiple comparisons post-hoc test were used. Statistical analysis was calculated using

284 Graphpad Prism. Alpha level for all tests was  $p=0.05$ . The code used for the analysis is available  
285 from the corresponding authors upon request.

## 286 **Results**

### 287 Overview of experimental assessment timeline

288 The behavioral testing timeline is depicted in Figure 1A. After ~1 week of chronic window and  
289 head-fixation bar surgical recovery, all mice underwent tapered beam training and testing to  
290 examine baseline gross motor function. Mice were then water restricted and trained to perform  
291 skilled forelimb water-reaching (Fig. 1B). Behavioral camera recording combined with markerless  
292 pose estimation (Mathis et al., 2018) enabled tracking and assessment of progressive forelimb  
293 coordination defects. Simultaneous recording of cortical activity using GCaMP6 mesoscale  
294 imaging further enabled assessment of progressive cortical circuit changes. After the completion  
295 of water-reaching assessment, mice were allowed to rest and readjust to *ad libitum* water  
296 consumption. Mice then underwent rotarod testing and a second round of tapered beam testing to  
297 confirm HD motor defects seen in the water-reaching task. Finally, immunohistochemistry staining  
298 of DARPP-32, a striatal medium spiny neuron (MSN) marker, was conducted to confirm HD  
299 pathology. Mice were weighed daily to monitor health (data not shown).

### 300 Progressively reduced forelimb motor performance in HD mice

301 Trial structure for the water-reaching task with alternating rewarded and non-rewarded trials is  
302 depicted in Figure 1C. Briefly, a visual cue was delivered 2 s after initiation of camera recording  
303 for all trials. For rewarded trials, an auditory cue and water drop was delivered 4 s later (6 s since  
304 start of trial). For non-rewarded trials only an auditory cue was given with no water delivered.

305 Water-reaching performance in both genotypes was quantified over 60 days (Fig. 2). Over time  
306 mice were trained during rewarded trials to reach forward towards the spout from their resting  
307 position (reach-to-grasp behavior), grasp the water drop then successfully bring the water to their  
308 mouth to drink (grasp-to-drink behavior)(Fig. 3A)(Supplemental Video 1-2). We refer to this  
309 overall as the ‘*reach-grasp-drink*’ movement. Although no aversive punishment was given for  
310 reaching the spout during non-rewarded trials, no water reward was available on the spout making  
311 any attempts futile.

312 On Day 1 there were minimal successful trials as both groups were learning the task (Fig. 2A). In  
313 both genotypes (Day 1) the largest proportion of rewarded trials were spent not engaging with the  
314 task (no reach)(WT:  $58.7 \pm 4.7\%$ ; HD:  $67.9 \pm 5.0\%$ )(Fig. 2C) with the second largest proportion of  
315 trials spent reaching the water spout to swat the water away (partial fail)(WT:  $22.3 \pm 5.1\%$ ; HD:  
316  $33.4 \pm 4.2\%$ )(Fig. 2B). After performing successful trials for the first time on Day 3 ( $20.1 \pm$   
317  $6.8\%$ )(Fig. 2A), WT mice engaged in frequent unrewarded reaching and/or groom-to-reach  
318 behavior on Day 5 ( $41.8 \pm 10.0\%$ )(Fig. 2D). WT mice however, quickly decreased unrewarded  
319 reaching behavior and by Day 8 performed minimal unrewarded reach trials ( $9.4 \pm 2.7\%$ ). WT  
320 mice achieved a near perfect success performance rate by Day 8 (WT:  $89.2 \pm 3.7\%$ )(Fig. 2A).

321 Similar to WT mice, HD mice also after performing successful trials for the first time on Day 3  
322 ( $61.6 \pm 14.3\%$ )(Fig. 2A) engaged in frequent unrewarded reaching and/or groom-to-reach behavior  
323 on Day 5 ( $42.6 \pm 11.6\%$ )(Fig. 2D). The frequency of unrewarded reaching however, persisted.  
324 Although HD mice also reached near perfect success performance rates by Day 8 (HD  $92.3 \pm$   
325  $2.5\%$ )(Fig. 2A) significantly more unrewarded reaching was still present on this day compared to

326 WT (WT:  $9.4 \pm 2.7\%$ ; HD:  $43.9 \pm 12.3\%$ ;  $p=0.0169$ ). By Day 15, the unrewarded reach trials in  
327 HD mice decreased to the same frequency as seen in WT mice.

328 Over time WT mice were able to maintain their high success rate until at least Day 60 (Fig. 2A).  
329 HD mice however, experienced a progressive decline in successful trials. By Day 60 the successful  
330 performance rate was  $31.1 \pm 10.0\%$  for HD mice. No significant changes in weight were seen  
331 throughout the entire behavioral testing timeline indicating water restriction was not the cause of  
332 HD mice performance decline (data not shown).

333 Unsuccessful trials were divided and scored as either no reach, groom, partial fail and complete  
334 fail trials (Extended Data Fig. 2-1). Partial fail scores denote trials where the mouse made contact  
335 with the spout and removed the water drop from the spout but was unable to retain the water drop  
336 (successful reach-to-grasp performance but failed grasp-to-drink performance). Complete fail  
337 scores denote trials where the mouse lifted their paw in a reaching behavior but the paw did not  
338 make contact with the spout (failed reach-to-grasp performance).

339 The low prevalence of complete fail trials for the duration of behavioral testing for HD mice  
340 (Extended Data Fig. 2-1A) suggest that failure to perform the reach-to-grasp segment of the  
341 forelimb movement does not explain the decline in successful performance. HD mice, however,  
342 develop a significant increase in partial fail trials compared to WT mice by Day 30 (WT:  $9.6 \pm$   
343  $2.2\%$ ; HD:  $41.3 \pm 4.2\%$ ;  $p=0.0024$ )(Fig. 2B) suggesting instead the grasp-to-drink segment of the  
344 movement was impaired. By Day 60 HD mice also developed a significant increase in no reach  
345 trials compared to WT mice (WT:  $6.5 \pm 6.5\%$ ; HD:  $34.6 \pm 8.1\%$ ;  $p=0.0007$ )(Fig. 2C). Throughout  
346 the whole duration of behavioral testing, mice in both genotypes spent a minimal number of  
347 rewarded trials grooming (Extended Data Fig. 2-1).



### 348 Increased distance and variable forelimb reaching movement in HD mice

349 On average, WT mice were able to obtain the water drop  $1.0 \pm 0.1$  s after reward delivery. As such,  
350 markerless pose estimation was used to track the left paw from the time of water reward delivery  
351 to 1.1 s afterwards (Fig. 3). Euclidean distance traveled by the left paw during successful trials is  
352 presented as multiples of the spout distance over this fixed period of time. Sample paired  
353 distribution of reaching trajectory distances for two WT (gray) and three HD (teal) mice on Day 8  
354 (top panels) and Day 45 (bottom panels) with corresponding average euclidean distance and trial-  
355 to-trial standard deviation are shown (Fig. 3B)(all mice are shown in Extended Data Fig. 3-1).  
356 Unlike on Day 8 when the average euclidean distance traveled by the left paw was the same in  
357 both genotypes (WT:  $2.1 \pm 0.1$ ; HD:  $2.1 \pm 0.1$  spout distances;  $p=0.9811$ ), the left paw of HD mice  
358 traveled a greater distance during the reach on Day 45 than WT mice (WT:  $1.9 \pm 0.2$ ; HD:  $2.4 \pm$   
359  $0.2$  spout distances;  $p=0.0320$ )(Fig. 3D). Sample left paw reaching trajectories on Day 45 are  
360 shown for WT and HD mice (Fig. 3C). The variability in reaching distances for all successful trials  
361 on Day 8 (measured as the standard deviation) was not statistically different between genotypes  
362 (WT:  $0.62 \pm 0.14$ ; HD:  $0.84 \pm 0.12$  spout distances;  $p=0.3397$ )(Fig. 3E). On Day 45 however, HD  
363 mice displayed a greater variability in reaching trajectory distances than WT mice (WT:  $0.51 \pm$   
364  $0.05$ ; HD:  $0.95 \pm 0.11$ ;  $p=0.0360$ ).

### 365 Changes in cortical activity dynamics during reaching over time in HD mice

366 The brain-to-atlas approach in MesoNet (Xiao et al., 2021) was used to register cortical images to  
367 a common atlas using predicted cortical landmarks. Regions of interest (ROIs) were then defined  
368 (Fig. 4A; ROIs are color and number labeled). Sample heat maps of trial-to-trial cortical  $\Delta F/F$  for

369 select ROIs during successful, unrewarded reach and/or partial fail trials on Day 8 and/or 45 from  
370 a WT and HD mouse are shown (Fig. 4B)(all mice are shown in Extended Data Fig. 4-1 to 4-3).

371 Sample time series of GCaMP6 cortical wide-field imaging on Day 8 and 45 are shown in the top  
372 panels of Figure 5A for a representative WT and HD mouse. On Day 8 despite both HD and WT  
373 mice having comparable success rates (Fig. 2A) and reaching distances (Fig. 3D), genotype  
374 differences in cortical activity were apparent (Extended Data Fig. 5-1). Examining specific ROIs  
375 further revealed that the peak amplitude across all ROIs in both the contralateral and ipsilateral  
376 hemisphere was greater in WT compared to HD mice (contralateral:  $F_{1,8}=5.925$ ,  $p=0.0409$ ,  
377 ANOVA; ipsilateral:  $F_{1,8}=5.967$ ,  $p=0.0404$ , ANOVA)(Extended Data Fig. 5-1). Together this  
378 indicates that on Day 8, more extensive cortical activation associated with reaching was seen in  
379 WT compared to HD mice.

380 When examined longitudinally within genotypes (comparison of Day 8 to Day 45), the peak  
381 amplitude across all ROIs in the contralateral hemisphere increased in HD mice ( $F_{1,10}=5.521$ ,  
382  $p=0.0407$ , ANOVA)(Fig. 5C) with no significant changes in WT mice ( $F_{1,72}=0.006$ ,  $p=0.9388$ ,  
383 ANOVA)(Fig. 5B). In particular, the pixel regions centered in the contralateral secondary motor  
384 cortex (M2) and retrosplenial cortex lateral agranular part (rspagl) displayed significantly greater  
385 peak amplitude over time in HD mice (Fig. 5C). No significant changes in peak amplitude across  
386 all ROIs in the ipsilateral hemisphere were seen over time for WT ( $F_{1,6}=0.026$ ,  $p=0.8770$ ,  
387 ANOVA) and HD ( $F_{1,10}=0.709$ ,  $p=0.4193$ , ANOVA) mice when comparing within genotypes (Fig.  
388 5F-G).

389 When comparing genotypes (WT to HD) a significant difference in contralateral M2 peak activity  
390 was seen on Day 45 (WT:  $2.6 \pm 0.7$ ; HD:  $5.8 \pm 0.9$ ;  $p=0.0455$ )(Fig. 5E). Figure 5D shows the

391 average time course of contralateral M2  $\Delta F/F$  activation on Day 8 and 45 for all mice. Genotype  
392 differences were also seen in contralateral sspm, sspbfd and visp cortices on Day 8 (Extended Data  
393 Fig. 5-2). Comparing WT to HD mice overtime further reveals differences in ipsilateral M2, rspagl  
394 and retrosplenial cortex, dorsal part (rspd)(Extended Data Fig. 5-3).

#### 395 Unrewarded reach, fail vs success trials performed by HD mice

396 In addition to performing progressively increased fail trials over time (Fig. 2B), HD mice also  
397 engaged in unrewarded reaching behavior for more days (Fig. 2D). We examined the cortical  
398 activity underlying these trial types further and compared them to successful trials. Sample time  
399 series of cortical imaging on Day 8 from a representative HD mouse is shown in Figure 6A for all  
400 successful, failed and unrewarded reach trials. On Day 8, compared to successful and failed trials,  
401 the peak amplitude of all ROIs in the contralateral and ipsilateral hemisphere was significantly  
402 reduced in unrewarded reach trials (Fig. 6B-C). In particular, the peak cortical activity at the  
403 contralateral rspd and rspagl was significantly reduced in unrewarded trials compared to successful  
404 and failed trials. Figure 6D shows the average time course of contralateral rspagl and rspd  $\Delta F/F$   
405 activation for all three trial types and mice on Day 8. A significantly greater area was also activated  
406 after the water reward when HD mice were performing successful and failed trials than during  
407 unrewarded reach trials (Fig. 6E). No differences in peak amplitude or area activated were seen  
408 when comparing successful to failed trials on Day 45 (Extended Data Fig. 6-1).

409

410

411 Forelimb coordination and movement defects are coincident with gross motor defects and HD  
412 pathology

413 To confirm the progressive aberrant forelimb movement phenotype characterized with water-  
414 reaching testing, HD mice were examined and compared to WT mice using classical tapered beam  
415 and rotarod testing (Fig. 7A-D). Before the water-reaching assessment, with the exception of Day  
416 1 when WT mice learned to traverse the tapered beam faster than HD (WT:  $5.418 \pm 0.618$  s; HD:  
417  $8.320 \pm 0.997$  s;  $p=0.0265$ ), both genotypes spent on average, the same time traversing the tapered  
418 beam (Fig. 7A) indicating HD mice likely do not have a motor deficit at this stage. All mice were  
419 also subjected to a second round of tapered beam testing after water-reaching assessment (Fig.  
420 7B). During this second testing phase, with the exception of Day 1, WT mice traversed the beam  
421 significantly faster than HD mice. We then compared the performance of the mice during the first  
422 round of testing (mice aged ~5 months) with the second round (mice aged ~8 months). Day 4 has  
423 previously been used as the first testing day after successful learning of the task (Ardesch et al.,  
424 2017). Comparison of Day 4 during the first round of testing to the last assessment day (Day 7)  
425 during the second round of testing, revealed that WT mice traversed the beam in a faster time by  
426 the last assessment day (first testing round Day 4:  $4.728 \pm 0.532$  s; second testing round Day 7:  
427  $2.097 \pm 0.077$  s;  $p=0.0044$ )(Fig. 7C). For HD mice, the time to traverse the beam did not change  
428 between the first (Day 4:  $5.541 \pm 0.614$  s) and second (Day 7:  $5.550 \pm 1.192$  s) round of testing  
429 (Fig. 7C).

430 Further in support of the idea HD mice were experiencing motor and balance defects by the second  
431 round of tapered beam testing (~8 months of age), HD mice also displayed impaired performance  
432 on the accelerating rotarod task as determined by a decreased latency to fall compared to WT (Fig.

433 7D). Together, the second round of tapered beam and rotarod testing - both performed after water-  
434 reaching assessment - suggest HD mice have reached the motor manifest stage of disease. This is  
435 consistent with the decreased success rate seen by the end of the water-reaching task in HD mice  
436 (Fig. 2A).

437 Finally, to confirm HD pathology, striatal MSNs which make up 95% of all neurons in the striatum  
438 were immunostained for DARPP-32 (Fig. 7E-G). Consistent with previous literature (Peng et al.,  
439 2016; Southwell et al., 2016), a significant decrease in DARPP-32 (relative intensity WT:  $0.531 \pm$   
440  $0.035$ ; HD:  $0.162 \pm 0.014$ ;  $t=9.765$ ;  $df=6$ ;  $p<0.0001$ ) but not NeuN (relative intensity WT:  $0.86 \pm$   
441  $0.07$ ; HD:  $0.81 \pm 0.05$ ;  $t=0.5644$ ;  $df=6$ ;  $p=0.5930$ ) intensity was seen in HD compared to WT mice  
442 further confirming the manifestation of HD phenotype at ~8 months of age (Fig. 7G).

## 443 **Discussion**

444 The shared evolutionary origin and characteristics of skilled forelimb movements (Whishaw et al.,  
445 1992; Galiñanes et al., 2018) enable translational parallels to be drawn from preclinical mouse  
446 studies. In HD patients and pre-symptomatic carriers, deficits in motor learning, temporal  
447 sequencing and coordination of voluntary movements have been reported (Feigin et al., 2006;  
448 Klein et al., 2011; Shabbott et al., 2013). Using a water-reaching task, we reveal the presence of  
449 event sequence learning defects and progressive increases in cortical activity underlying forelimb  
450 deficits in the zQ175 HD mouse model (see Fig. 8 for a summary of the results).

### 451 Task acquisition and performance across genotypes

452 For most motor tasks, initial learning is accompanied by trial-to-trial variability, enabling spatial  
453 exploration and progress towards efficient task execution (Dhawale et al., 2019). Variability is

454 subsequently reduced after strategy formation (Churchland et al., 2006). We observe similar  
455 features since by Day 8, both HD and WT mice were able to successfully learn the reach-to-grasp  
456 movement. Although the movement was successfully learned by both genotypes, cortical activity  
457 underlying successful reaches was reduced in HD mice compared to WT. HD mice also required  
458 more days to learn the alternating reward/non-reward event sequence. We speculate that the  
459 extended continuation of reaching behavior during non-rewarded trials in HD mice could be a  
460 result of underlying cognitive defects that slow learning due to an inability to remember when to  
461 reach or failure to suppress motor movement.

462 Over time HD mice experienced a significant drop in successful reaches compared to WT. The  
463 increased trial-to-trial variability seen in HD mice compared to WT mice on Day 45 suggests that  
464 HD mice are attempting compensatory changes in reaching strategy at a time when they  
465 experienced a drop in performance. Consistent with this, positional error correction of the forelimb  
466 has previously been observed in consecutive reach trials (Becker et al., 2020). The significant  
467 increase in partial fail trials but not complete fail trials further suggests HD mice fail to engage in  
468 proper end-point fine motor corrections during the grasp-to-drink segment of the task (Elliott et  
469 al., 2001). Semi-flexed or closed paws have been shown to result in failed target reaching trials  
470 (Whishaw et al., 2018b) and could explain the decline in successful performance rates seen in HD  
471 mice. By Day 60, decreased task engagement was seen indicating that movement defects in HD  
472 mice increased in severity and alternative reaching strategies were no longer sufficient to mediate  
473 continued motivation and task engagement.

474

475

476 Bilateral engagement of mesoscale cortical circuits during reaching

477 Consistent with other studies that report global activation of the cortex and involvement of the  
478 ipsilateral hemisphere during limb movement (Heming et al., 2019; Soma et al., 2019; Brunner et  
479 al., 2020; Quarta et al., 2022), our results also revealed widespread cortical activation across both  
480 hemispheres during water-reaching. Although we did not see wide-spread enhanced cortical  
481 activity in HD mice as some work indicates (Arnoux et al., 2018; Burgold et al., 2019; Sepers et  
482 al., 2021) compared to WT (except in M2), global cortical activation associated with reaching  
483 increased over time in HD mice (but not WT). The lack of increased cortical activity may be due  
484 to differences in task-performing awake versus anesthetized animals, HD mouse models and/or  
485 cortical areas examined. We speculate that this increase in cortical activity seen over time in HD  
486 mice may be driven by increases in average euclidean distance of the reaching trajectory. The  
487 increased euclidean distance seen in HD mice was a result of multiple sub-reach attempts that  
488 eventually led to successful task execution. Another explanation could involve changes in local  
489 inhibitory inputs (Cummings et al., 2009), spontaneous firing rates and/or activity of the striatum  
490 (Donzis et al., 2020) overtime during water-reaching assessment.

491 Examining cortical regions of interest revealed genotypic differences in peak GCaMP6 cortical  
492 responses in M2, sspm, sspbfd and visp of the contralateral hemisphere and rspagl, rspd and M2  
493 of the ipsilateral hemisphere. Differences have been reported in tongue protrusions during freely  
494 moving pellet reaching between individual mice and trial types (Whishaw et al., 2018a). Although  
495 tongue protrusions were not evident in either WT or HD mice, adjustments to the tongue within  
496 the mouth, the mouth itself or whisking could explain the differences seen in sspm and sspbfd.  
497 Chemosensory, but not spatial or visual cues have been shown to guide water-reaching behavior

498 (Galiñanes et al., 2018). The genotypic significance of visual areas seen in this study necessitates  
499 further investigation into visual and other cortical areas not typically examined in the context of  
500 forelimb reaching and other motor tasks.

501 The retrosplenial cortex also showed genotype-specific changes and has been linked to spatial  
502 memory and navigation (Czajkowski et al., 2014; Milczarek et al., 2018). Retrosplenial cortices  
503 may be involved in learning and maintaining correct spatial orientation of the paw towards the  
504 target (water reward). Further investigations are needed to fully understand the role retrosplenial  
505 cortices play in forelimb reaching and its contributions to HD phenotype.

506 Optogenetic cortical silencing has revealed the motor cortex is critical for the adjustment of  
507 complex grasping movements (Mohammed et al., 2020). Specifically, M2 has also been reported  
508 to encode movement distance and smoothness (Quarta et al., 2022). Our findings that HD mice  
509 fail to perform the grasp-to-drink portion of the movement (increased partial fail trials compared  
510 to WT) and have an increased average euclidean distance in their reaching trajectory compared to  
511 WT likely explains the genotypic hyperactivity seen in HD contralateral M2 compared to WT and  
512 is consistent with the previously reported roles M2 plays in forelimb reaching. This M2  
513 hyperactivity evident at the motor manifest, but not premanifest stage is analogous to increases in  
514 striatal activity seen over time in HD (YAC128) mice during rotarod performance (Koch et al.,  
515 2022).

516 We acknowledge that epifluorescence wide-field calcium imaging which we use to assess  
517 excitability has reduced temporal resolution compared with voltage sensitive dyes and is sensitive  
518 to artifacts associated with light scattering, hemodynamics and movement. ROIs generated using  
519 deep learning cortical image and landmark registration to a common atlas may also not represent



520 the same regions as those determined functionally. To mitigate some of these limitations, strobing  
521 of green reflectance light was used to correct hemodynamic artifacts (Wekselblatt et al., 2016;  
522 Vanni et al., 2017; Xiao et al., 2017). The head-fixed set-up further reduced movement. Despite  
523 some limitations, our study has demonstrated the water-reaching task can reliably characterize  
524 forelimb motor defects in HD mice and reveal aberrant cortical activity in HD mice.

525 At a time when HD and WT mice were capable of achieving similar success performance rates at  
526 the water-reaching task, our study and others (Peng et al., 2016; Liu et al., 2021) report no  
527 significant differences in tapered beam traverse time suggesting zQ175 mice are in the premanifest  
528 stages of HD at ~5 months of age. Later, when HD mice experienced reduced performance at the  
529 water-reaching task, we and others also reported seeing increased time to traverse the tapered  
530 beam, decreased latency to fall from the rotarod, and decreased DARPP32 expression in striatal  
531 MSNs (Smith et al., 2014; Peng et al., 2016; Southwell et al., 2016; Liu et al., 2021) suggesting  
532 manifestation of HD motor phenotype and pathology in zQ175 mice occurs by ~8 months of age.

533 Future studies could examine the contribution of diverse cortical areas (such as retrosplenial, visual  
534 and somatosensory) and subcortical regions (such as the striatum (Brunner et al., 2020),  
535 cerebellum (Guo et al., 2021) and thalamus (Sauerbrei et al., 2020)) to forelimb tasks in mouse  
536 models of HD and other movement disorders. Therapeutic rescue of the HD phenotype using  
537 optogenetics and parsing the contribution of direct-indirect striatal (Reiner et al., 1988; Albin et  
538 al., 1992; Barry et al., 2018) and M2 cortico-striatal pathways (Fernández-García et al., 2020)  
539 would also enable mechanistic understandings of HD forelimb defects. The ability of the water-  
540 reaching task to characterize HD phenotype suggests it can potentially be used to inform the onset  
541 of other movement disorders, therapeutic intervention windows and test drug efficacy.

542 **Multimedia**

543 Supplemental Video 1: Representative WT mouse performing a successful trial.

544 Simultaneous cortical wide-field GCaMP imaging ( $\Delta F/F$ ) and water-reaching behavior video  
545 (front and side view) from a WT mouse performing a successful trial. Scale bar denotes 0.5 mm.

546 Supplemental Video 2: Representative HD mouse performing a successful trial.

547 Simultaneous cortical wide-field GCaMP imaging ( $\Delta F/F$ ) and water-reaching behavior video  
548 (front and side view) from a HD mouse performing a successful trial. Scale bar denotes 0.5 mm.

549

550 **Figure legends**

551 Figure 1: Scheme of behavioral testing.

552 **(A)** Animals were allowed to recover from surgery (~1 week) before initial tapered beam testing  
553 (5 days) which was followed by water-restricted forelimb water-reaching testing (~67 days).

554 Mice were then readjusted to *ad libitum* water consumption (~5 days) before rotarod testing (4  
555 days) and final tapered beam testing (7 days) with one day in between rotarod and tapered beam

556 testing to allow stamina recovery. **(B)** Side-view image of a representative head-fixed mouse in  
557 the water-reaching task. **(C)** Trial structure for the water-reaching task where alternating

558 rewarded and non-rewarded trials were performed. The intertrial interval was 4 s. A visual cue 2  
559 s after initiation of camera recording was followed by an auditory cue and water drop reward for

560 rewarded trials and only an auditory cue for non-rewarded trials both 6 s after initiation of

561 camera recording. If a spout touch was detected after water reward delivery, the rewarded trial

562 ended 4 s after the spout touch was detected. In cases where a spout touch was not detected, the

563 rewarded trial timed out 10 s after water reward delivery. All non-rewarded trials ended 10 s  
564 after the auditory cue. Total trial length was therefore 16 s for non-rewarded trials and could  
565 range from 10-16 s for rewarded trials depending on if a water spout touch was detected. For  
566 consistency, all trial lengths were truncated to 10 s in total for subsequent analyses.

567 Figure 2: Water-reaching task behavioral categorization.

568 HD (n = 6) and WT (n = 4) mice are denoted in teal and gray, respectively. **(A-C)** Percent of  
569 successful **(A)**, partial fail **(B)** and no reach **(C)** trials to the total number of rewarded trials over  
570 time. **(D)** Percent of unrewarded reach trials (reaching occurs despite there being no reward) to  
571 the total number of non-rewarded trials over time. Shaded intervals denote standard error of the  
572 mean. \*\*\*, \*\* and \* denotes  $p < 0.005$ ,  $< 0.01$  and  $< 0.05$ , respectively.

573 Figure 3: Kinematic analysis of successful trials.

574 HD (n = 6) and WT (n = 4) mice are denoted in teal and gray, respectively. **(A)** Representative  
575 images depicting the mouse at rest and the reach-grasp-drink water-reaching movement. Dots  
576 represent either different body parts or equipment labeled for use in markerless pose estimation.  
577 The spout distance (calculated from the height of the platform to the height of the spout; see  
578 Methods for more details) is depicted in red. **(B)** Distribution of euclidean distance traveled  
579 (water reward delivery to 1.1 s afterwards) by the left paw during successful rewarded trials on  
580 Day 8 (top graphs) and Day 45 (bottom graphs) for representative WT and HD mice. The  
581 distance traveled in each trial was binned with intervals reflecting how many more times the path  
582 taken was compared to the spout distance (see Methods for more details). Relative frequencies  
583 (%) of each bin are reported. Average euclidean distance traveled ( $\bar{x}$ ) and standard deviation  
584 (STD) are indicated and reflect multiples of spout distance. **(C)** Representative left paw X, Y

585 trajectories of WT (top trace) and HD (middle and bottom traces) mice performing a successful  
586 water-reaching movement during a rewarded trial on Day 45. Arrows denote path of trajectory.  
587 **(D-E)** Average euclidean distance traveled across all successful trials **(D)** and trial-to-trial  
588 variability (Standard deviation; STD) of successful reaching trajectories **(E)** on Day 8 and 45.  
589 Measurements are given in multiples of spout distance; D and E are per mouse averages. \*  
590 denotes  $p < 0.05$ .

591 Figure 4: Representative trial-to-trial GCaMP cortical activity in regions of interest.

592 **(A)** Cartoon depicts regions of interest investigated in subsequent analyses. **(B)** Representative  
593 trial-to-trial heat-map of GCaMP ( $\Delta F/F$ ) cortical activity in contralateral M1 (primary motor), M2  
594 (secondary motor), sspfl (somatosensory forelimb) and rspagl (retrosplenial lateral agranular) from  
595 a WT and HD mouse on Day 8 and Day 45 for success, unrewarded reach and/or partial fail trials.  
596 Individual trials are stacked in rows. Time of the water reward (for rewarded trials) and tone (for  
597 non-rewarded trials) is denoted with a black line.

598 Figure 5: Longitudinal mesoscale GCaMP imaging of the cortex during water-reaching.

599 HD ( $n = 6$ ) and WT ( $n = 4$ ) mice are denoted in teal and gray, respectively.  $5 \times 5$  pixel regions are  
600 centered in regions of interest (ROIs) and examined. **(A)** Time series of cortical wide-field GCaMP  
601 imaging ( $\Delta F/F$ ) from a representative WT (left panels) and HD (right panels) mouse on Day 8 (top  
602 panels) and Day 45 (bottom panels) during successful trials. **(B-C)** Peak  $\Delta F/F$  amplitude of ROIs  
603 in the contralateral hemisphere on Day 8 and Day 45 for WT ( $F_{1,72} = 0.006$ ,  $p = 0.9388$ , ANOVA) **(B)**  
604 and HD ( $F_{1,10} = 5.521$ ,  $p = 0.0407$ , ANOVA) **(C)** mice. **(D)** Time course of M2 (secondary motor  
605 cortex) activation on Day 8 (top panel) and Day 45 (bottom panel). Vertical dotted line denotes  
606 time of water reward delivery. Horizontal dotted line denotes zero  $\Delta F/F$  level. Significance reflects

607 a difference in genotype peak response. **(E)** Corresponding change in peak  $\Delta F/F$  amplitude of M2  
608 over time. **(F-G)** Peak  $\Delta F/F$  amplitude of ROIs in the ipsilateral hemisphere on Day 8 and Day 45  
609 for WT ( $F_{1,6}=0.026$ ,  $p=0.8770$ , ANOVA)**(F)** and HD ( $F_{1,10}=0.709$ ,  $p=0.4193$ , ANOVA)**(G)** mice  
610 (WT and HD day factor: not statistically significant) \*\*\*, \*\* and \* denotes  $p<0.005$ ,  $<0.01$  and  
611  $<0.05$ , respectively.

612 Figure 6: Mesoscale GCaMP imaging of the cortex during success, fail and unrewarded reach  
613 trials performed by HD mice on Day 8.

614 HD ( $n = 6$ ) success, fail and unrewarded reach trials are denoted in green, blue and red,  
615 respectively. **(A)** Time series of cortical wide-field GCaMP imaging ( $\Delta F/F$ ) from a  
616 representative HD mouse on Day 8 during success (top), fail (middle) and unrewarded reach  
617 (bottom) trials. **(B-C)** Peak amplitude of regions of interest in the contralateral ( $F_{2,15}=3.862$ ,  
618  $p=0.0444$ , ANOVA)**(B)** and ipsilateral ( $F_{2,15}=9.526$ ,  $p=0.0021$ , ANOVA)**(C)** hemisphere for  
619 different trial types. **(D)** Time course of contralateral rspagl (retrosplenial cortex lateral agranular  
620 part) and rspd (retrosplenial cortex dorsal part) activity. Vertical dotted line denotes time of  
621 water reward delivery. Horizontal dotted line denotes zero  $\Delta F/F$  level. Significance reflects a  
622 difference in unrewarded reach peak response compared to other trial types. **(E)** Area activated  
623 across the entire trial duration for success, fail and unrewarded reach trials. The threshold was set  
624 at 4x standard deviation (STD) of the baseline. Significance of area activated after the water  
625 reward for unrewarded reach trials compared to other trial types is indicated. \* denotes  $p<0.05$ .

626 Figure 7: Tapered beam and rotarod gross motor assessment and post-mortem  
627 immunohistochemistry staining.

628 HD and WT mice are denoted as teal and gray, respectively. **(A-B)** Time to traverse the tapered

629 beam determined before (~5 months)(**A**) and after (~8 months)(**B**) water-reaching testing for HD  
630 (n = 6) and WT (n = 6) mice. (**C**) Time to traverse the tapered beam on the first day after  
631 completion of tapered beam learning (mice age: ~5 month; day of testing: 4) compared to the last  
632 testing date (mice age: ~8 month; day of testing: 7) for HD and WT mice. (**D**) Latency to fall  
633 from the rotarod determined after water-reaching testing (~8 months) for HD (n = 6) and WT (n  
634 = 6) mice. (**E**) Representative Thy1-GCaMP6s coronal slice. DARPP-32 intensity was quantified  
635 in the striatum. (**F**) Representative images of DARPP-32, NeuN and DAPI staining in the  
636 striatum with a merged overlay from a WT and HD mouse. (**G**) DARPP-32 and NeuN intensity  
637 in the striatum of HD (n = 4) compared to WT (n = 4) mice. Error bars and shaded intervals  
638 denote standard error of the mean. \*\*\*\*, \*\*, \* and N.S. denote  $p < 0.0001$ ,  $< 0.01$ ,  $< 0.05$  and  
639 statistically non-significant, respectively as determined by Two-way Anova and Šídák's multiple  
640 comparisons post-hoc test for tapered beam and rotarod tests and unpaired T-test for  
641 immunohistochemistry staining.

642 Figure 8: Schematic summary of altered cortical activity and motor defects in HD mice.  
643 Timeline of HD (top) and WT (bottom) learning and performance in the water-reaching task.  
644 Corresponding tapered beam and rotarod tasks used to validate the phenotypes observed in the  
645 water-reaching tasks are included. WT mice learn both the reach-grasp-drink movement and task  
646 event sequence (alternating reward then non-rewarded trial) by Day 8 (gray). Although HD mice  
647 also learn the reach-grasp-drink movement by Day 8 (gray) HD mice show reduced cortical  
648 activation compared to WT mice. HD mice also take longer to learn the task event sequence (green)  
649 than WT mice. Over time the peak cortical activity, euclidean distance and variability of the  
650 reaching trajectory increases in HD mice but little to no change was seen in WT mice. Unlike WT

651 mice, HD mice also do not maintain their rate of successful performance overtime. HD mice  
652 experience first a progressive increase in partial fail trials then an increase in no reach trials  
653 reflecting failed grasp-to-drink then low task engagement, respectively. Overall, this indicates a  
654 progressively worsening forelimb motor coordination defect (light to dark teal) in HD mice.

655

## 656 **Extended data figure legends**

### 657 Extended data Figure 2-1: Categorization of unsuccessful rewarded trials.

658 Proportion of unsuccessful rewarded trial types (no reach: blue; groom: purple; partial fail:  
659 green; complete fail: dark teal) and total unsuccessful trials (line) to the total number of rewarded  
660 trials for HD (n = 6)(**A**) and WT (n = 4)(**B**) mice overtime. Error bars denote standard error of  
661 the mean. Grooming and complete fail trials in both genotypes were minimal with no statistical  
662 differences between genotypes.

### 663 Extended data Figure 3-1: Euclidean distance distribution for successful trials on Day 8 and Day 664 45.

665 Distribution of euclidean distance traveled by the left paw (water reward delivery to 1.1 s  
666 afterwards) during successful rewarded trials on Day 8 (top graphs) and Day 45 (bottom graphs)  
667 for all WT (gray) and HD (teal) mice. The distance traveled in each trial was binned with intervals  
668 reflecting how many more times the path taken was compared to the spout distance (calculated  
669 from the height of the platform to the height of the spout; see Methods for more details). Relative  
670 frequencies (%) of each bin are reported. Average euclidean distance traveled ( $\bar{x}$ ) and standard  
671 deviation (STD) are indicated in multiples of spout distance.

672 Extended data Figure 4-1: WT trial-to-trial GCaMP heat-map for successful trials.

673 Success trial-to-trial heat-map of GCaMP ( $\Delta F/F$ ) cortical activity in contralateral M1 (primary  
674 motor), M2 (secondary motor), sspfl (somatosensory forelimb) and rspagl (retrosplenial lateral  
675 agranular) for all WT mice on Day 8 and Day 45. Individual trials are stacked in rows. Time of  
676 the water reward is denoted with a black line.

677 Extended data Figure 4-2: HD trial-to-trial GCaMP heat-map for successful trials.

678 Success trial-to-trial heat-map of GCaMP ( $\Delta F/F$ ) cortical activity in contralateral M1 (primary  
679 motor), M2 (secondary motor), sspfl (somatosensory forelimb) and rspagl (retrosplenial lateral  
680 agranular) for all HD mice on Day 8 and Day 45. Individual trials are stacked in rows. Time of the  
681 water reward is denoted with a black line.

682 Extended data Figure 4-3: HD trial-to-trial GCaMP heat-map for unrewarded reach and partial fail  
683 trials.

684 Partial fail and unrewarded reach trial-to-trial heat-map of GCaMP ( $\Delta F/F$ ) cortical activity in  
685 contralateral M1 (primary motor), M2 (secondary motor), sspfl (somatosensory forelimb) and  
686 rspagl (retrosplenial lateral agranular) for all HD mice on Day 45 and Day 8, respectively.  
687 Individual trials are stacked in rows. Time of the water reward (for partial fail trials) and tone (for  
688 unrewarded reach trials) is denoted with a black line.

689 Extended data Figure 5-1: Mesoscale GCaMP imaging of the cortex during successful trials on  
690 Day 8.

691 HD (n = 6) and WT (n = 4) mice are denoted in teal and gray, respectively. **(A-B)** Peak  
692 amplitude of regions of interest on Day 8 for successful trials in the contralateral ( $F_{1,8}=5.925$ ,



693  $p=0.0409$ , ANOVA)(**A**) and ipsilateral ( $F_{1,8}=5.967$ ,  $p=0.0404$ , ANOVA)(**B**) hemisphere. \*  
694 denotes  $p=0.0290$ .

695 Extended data Figure 5-2: Change in contralateral hemisphere ROI peak  $\Delta F/F$  amplitude over  
696 time.

697 Peak  $\Delta F/F$  amplitude of ROIs in the contralateral hemisphere over time for WT ( $n = 4$ )(gray) and  
698 HD ( $n = 6$ )(teal) mice. \*\* and \* denotes  $p<0.01$  and  $<0.05$ , respectively.

699 Extended data Figure 5-3: Change in ipsilateral hemisphere ROI peak  $\Delta F/F$  amplitude over time.

700 Peak  $\Delta F/F$  amplitude of ROIs in the ipsilateral hemisphere over time for WT ( $n = 4$ )(gray) and  
701 HD ( $n = 6$ )(teal) mice. \*\* and \* denotes  $p<0.01$  and  $<0.05$ , respectively.

702 Extended data Figure 6-1: Mesoscale GCaMP imaging of the cortex during success and fail trials  
703 performed by HD mice on Day 45.

704 HD ( $n = 6$ ) success and fail trials are denoted in green and blue, respectively. (**A-B**) Peak  
705 amplitude of regions of interest in the contralateral ( $F_{1,10}=2.540$ ,  $p=0.1421$ , ANOVA)(**A**) and  
706 ipsilateral ( $F_{1,10}=0.257$ ,  $p=0.6230$ , ANOVA)(**B**) hemisphere for different trial types. (**C**) Area  
707 activated across the entire trial duration for successful and failed trials. The threshold was set at  
708 4x standard deviation (STD) of the baseline. No significance between trial types.

709

## 710 **Acknowledgements**

711 This work was supported by resources made available through the NeuroImaging and  
712 NeuroComputation Centre at the Djavad Mowafaghian Centre for Brain Health (RRID:

713 SCR\_019086); the UBC Vice-President Research and Innovation funding for the Dynamic Brain  
714 Circuits Cluster of Excellence; Canadian Institutes of Health Research grants FDN 143210 to  
715 L.A.R. and FDN 143209 to T.H.M and Brain Canada Vectrology Foundry to L.A.R. and T.H.M.  
716 T.H.M. is also supported by the Brain Canada Neurophotonics Platform, the Heart and Stroke  
717 Foundation of Canada, and the Fondation LeDucq. Y.W. is supported by the Vanier Canada  
718 Graduate Scholarship and UBC's Four Year Doctoral Fellowship.

719

720 We thank Pumin Wang for surgical assistance and Lily Zhang for technical genotyping assistance.  
721 We thank Evan Fung for Day 23 behavioral trial scoring. We thank Daniel Ramandi for expert  
722 advice on rotarod assessment and water-reaching behavioral camera setup. We further thank  
723 Daniel Ramandi and Jeffrey M. LeDue for expert advice on custom Matlab code writing for  
724 GCaMP analysis.

725

#### 726 **Author contributions**

727 Y.W. and L.A.R. designed the behavior and post-mortem experiment testing scheme. D.X. and  
728 T.H.M. designed the trial structure for the water-reaching task. Y.W. performed the research. Y.W.  
729 and M.D.S. analyzed the data. Y.W. wrote the manuscript with input from T.H.M., L.A.R., M.D.S.  
730 and D.X..

#### 731 **Conflict of interest**

732 The authors declare no competing financial interests.

733

734 **References**

- 735 Abada Y-SK, Schreiber R, Ellenbroek B (2013) Motor, emotional and cognitive deficits in adult  
736 BACHD mice: a model for Huntington's disease. *Behav Brain Res* 238:243–251.
- 737 Albin RL, Reiner A, Anderson KD, Dure LS 4th, Handelin B, Balfour R, Whetsell WO Jr,  
738 Penney JB, Young AB (1992) Preferential loss of striato-external pallidal projection  
739 neurons in presymptomatic Huntington's disease. *Ann Neurol* 31:425–430.
- 740 Ardesch DJ, Balbi M, Murphy TH (2017) Automated touch sensing in the mouse tapered beam  
741 test using Raspberry Pi. *J Neurosci Methods* 291:221–226.
- 742 Arnoux I et al. (2018) Metformin reverses early cortical network dysfunction and behavior  
743 changes in Huntington's disease. *eLife* 7 Available at: <http://dx.doi.org/10.7554/elife.38744>.
- 744 Barry J, Akopian G, Cepeda C, Levine MS (2018) Striatal Direct and Indirect Pathway Output  
745 Structures Are Differentially Altered in Mouse Models of Huntington's Disease. *J Neurosci*  
746 38:4678–4694.
- 747 Batka RJ, Brown TJ, Mcmillan KP, Meadows RM, Jones KJ, Haulcomb MM (2014) The need  
748 for speed in rodent locomotion analyses. *Anat Rec* 297:1839–1864.
- 749 Becker MI, Calame DJ, Wrobel J, Person AL (2020) Online control of reach accuracy in mice. *J*  
750 *Neurophysiol* 124:1637–1655.
- 751 Brooks S, Higgs G, Janghra N, Jones L, Dunnett SB (2012) Longitudinal analysis of the  
752 behavioural phenotype in YAC128 (C57BL/6J) Huntington's disease transgenic mice. *Brain*

- 753 Res Bull 88:113–120.
- 754 Brunner C, Grillet M, Sans-Dublanc A, Farrow K, Lambert T, Macé E, Montaldo G, Urban A  
755 (2020) A Platform for Brain-wide Volumetric Functional Ultrasound Imaging and Analysis  
756 of Circuit Dynamics in Awake Mice. *Neuron* 108:861–875.e7 Available at:  
757 <http://dx.doi.org/10.1016/j.neuron.2020.09.020>.
- 758 Burgold J, Schulz-Trieglaff EK, Voelkl K, Gutiérrez-Ángel S, Bader JM, Hosp F, Mann M,  
759 Arzberger T, Klein R, Liebscher S, Dudanova I (2019) Cortical circuit alterations precede  
760 motor impairments in Huntington’s disease mice. *Scientific Reports* 9 Available at:  
761 <http://dx.doi.org/10.1038/s41598-019-43024-w>.
- 762 Cepeda C, Levine MS (2022) Synaptic dysfunction in Huntington’s disease: Lessons from  
763 genetic animal models. *Neuroscientist* 28:20–40.
- 764 Churchland MM, Afshar A, Shenoy KV (2006) A central source of movement variability.  
765 *Neuron* 52:1085–1096.
- 766 Cummings DM, André VM, Uzgil BO, Gee SM, Fisher YE, Cepeda C, Levine MS (2009)  
767 Alterations in cortical excitation and inhibition in genetic mouse models of Huntington’s  
768 disease. *J Neurosci* 29:10371–10386.
- 769 Czajkowski R, Jayaprakash B, Wiltgen B, Rogerson T, Guzman-Karlsson MC, Barth AL,  
770 Trachtenberg JT, Silva AJ (2014) Encoding and storage of spatial information in the  
771 retrosplenial cortex. *Proc Natl Acad Sci U S A* 111:8661–8666.
- 772 Dana H, Chen T-W, Hu A, Shields BC, Guo C, Looger LL, Kim DS, Svoboda K (2014) Thy1-

- 773 GCaMP6 transgenic mice for neuronal population imaging in vivo. *PLoS One* 9:e108697.
- 774 Dhawale AK, Miyamoto YR, Smith MA, Ölveczky BP (2019) Adaptive Regulation of Motor  
775 Variability. *Curr Biol* 29:3551–3562.e7.
- 776 Donzis EJ, Estrada-Sánchez AM, Indersmitten T, Oikonomou K, Tran CH, Wang C, Latifi S,  
777 Golshani P, Cepeda C, Levine MS (2020) Cortical Network Dynamics Is Altered in Mouse  
778 Models of Huntington’s Disease. *Cereb Cortex* 30:2372–2388.
- 779 Elliott D, Helsen WF, Chua R (2001) A century later: Woodworth’s (1899) two-component  
780 model of goal-directed aiming. *Psychol Bull* 127:342–357.
- 781 Feigin A, Ghilardi M-F, Huang C, Ma Y, Carbon M, Guttman M, Paulsen JS, Ghez CP,  
782 Eidelberg D (2006) Preclinical Huntington’s disease: compensatory brain responses during  
783 learning. *Ann Neurol* 59:53–59.
- 784 Fernández-García S, Conde-Berriozabal S, García-García E, Gort-Paniello C, Bernal-Casas D,  
785 García-Díaz Barriga G, López-Gil J, Muñoz-Moreno E, Soria G, Campa L, Artigas F,  
786 Rodríguez MJ, Alberch J, Masana M (2020) M2 cortex-dorsolateral striatum stimulation  
787 reverses motor symptoms and synaptic deficits in Huntington’s disease. *Elife* 9 Available  
788 at: <http://dx.doi.org/10.7554/eLife.57017>.
- 789 Galiñanes GL, Bonardi C, Huber D (2018) Directional Reaching for Water as a Cortex-  
790 Dependent Behavioral Framework for Mice. *Cell Rep* 22:2767–2783.
- 791 Guo J-Z, Sauerbrei BA, Cohen JD, Mischiati M, Graves AR, Pisanello F, Branson KM, Hantman  
792 AW (2021) Disrupting cortico-cerebellar communication impairs dexterity. *Elife* 10

- 793 Available at: <http://dx.doi.org/10.7554/eLife.65906>.
- 794 Heming EA, Cross KP, Takei T, Cook DJ, Scott SH (2019) Independent representations of  
795 ipsilateral and contralateral limbs in primary motor cortex. *Elife* 8 Available at:  
796 <http://dx.doi.org/10.7554/eLife.48190>.
- 797 Klein A, Sacrey L-AR, Dunnett SB, Whishaw IQ, Nikkhah G (2011) Proximal movements  
798 compensate for distal forelimb movement impairments in a reach-to-eat task in  
799 Huntington's disease: New insights into motor impairments in a real-world skill.  
800 *Neurobiology of Disease* 41:560–569 Available at:  
801 <http://dx.doi.org/10.1016/j.nbd.2010.11.002>.
- 802 Koch ET, Sepers MD, Cheng J, Raymond LA (2022) Early Changes in Striatal Activity and  
803 Motor Kinematics in a Huntington's Disease Mouse Model. *Mov Disord* Available at:  
804 <http://dx.doi.org/10.1002/mds.29168>.
- 805 Liu H, Zhang C, Xu J, Jin J, Cheng L, Miao X, Wu Q, Wei Z, Liu P, Lu H, van Zijl PCM, Ross  
806 CA, Hua J, Duan W (2021) Huntingtin silencing delays onset and slows progression of  
807 Huntington's disease: a biomarker study. *Brain* 144:3101–3113 Available at:  
808 <http://dx.doi.org/10.1093/brain/awab190>.
- 809 MacDonald ME et al. (1993) A novel gene containing a trinucleotide repeat that is expanded and  
810 unstable on Huntington's disease chromosomes. *Cell* 72:971–983.
- 811 Mathis A, Mamidanna P, Cury KM, Abe T, Murthy VN, Mathis MW, Bethge M (2018)  
812 DeepLabCut: markerless pose estimation of user-defined body parts with deep learning. *Nat*

- 813           Neurosci 21:1281–1289.
- 814   McColgan P, Tabrizi SJ (2018) Huntington’s disease: a clinical review. *Eur J Neurol* 25:24–34.
- 815   McFadyen MP, Kusek G, Bolivar VJ, Flaherty L (2003) Differences among eight inbred strains  
816           of mice in motor ability and motor learning on a rotarod. *Genes Brain Behav* 2:214–219.
- 817   Menalled L, Lutz C, Ramboz S, Brunner D, Lager B, Noble S, Park L, Howland D (2014) A  
818           field guide to working with mouse models of Huntington’s Disease. Bar Harbor:  
819           PsychoGenics Inc , The Jackson Laboratory, CHDI Foundation.
- 820   Milczarek MM, Vann SD, Sengpiel F (2018) Spatial Memory Engram in the Mouse  
821           Retrosplenial Cortex. *Curr Biol* 28:1975–1980.e6.
- 822   Mohammed H, Li Y, Di Grazia P, Bernstein A, Agger S, Hollis E (2020) Temporal regulation of  
823           motor behavior on a modified forelimb dexterity test in mice. *bioRxiv*:2020.10.18.344507  
824           Available at: <https://www.biorxiv.org/content/10.1101/2020.10.18.344507> [Accessed July  
825           24, 2022].
- 826   Murphy TH, Boyd JD, Bolaños F, Vanni MP, Silasi G, Haupt D, LeDue JM (2016) High-  
827           throughput automated home-cage mesoscopic functional imaging of mouse cortex. *Nat*  
828           *Commun* 7:11611.
- 829   Pallier PN, Drew CJG, Jennifer Morton A (2009) The detection and measurement of locomotor  
830           deficits in a transgenic mouse model of Huntington’s disease are task- and protocol-  
831           dependent: Influence of non-motor factors on locomotor function. *Brain Research Bulletin*  
832           78:347–355 Available at: <http://dx.doi.org/10.1016/j.brainresbull.2008.10.007>.

- 833 Peng Q, Wu B, Jiang M, Jin J, Hou Z, Zheng J, Zhang J, Duan W (2016) Characterization of  
834 Behavioral, Neuropathological, Brain Metabolic and Key Molecular Changes in zQ175  
835 Knock-In Mouse Model of Huntington's Disease. *PLoS One* 11:e0148839.
- 836 Pinto L, Rajan K, DePasquale B, Thiberge SY, Tank DW, Brody CD (2019) Task-Dependent  
837 Changes in the Large-Scale Dynamics and Necessity of Cortical Regions. *Neuron* 104:810–  
838 824.e9.
- 839 Pouladi MA, Morton AJ, Hayden MR (2013) Choosing an animal model for the study of  
840 Huntington's disease. *Nat Rev Neurosci* 14:708–721.
- 841 Quarta E, Scaglione A, Lucchesi J, Sacconi L, Allegra Mascaro AL, Pavone FS (2022)  
842 Distributed and Localized Dynamics Emerge in the Mouse Neocortex during Reach-to-  
843 Grasp Behavior. *J Neurosci* 42:777–788.
- 844 Reiner A, Albin RL, Anderson KD, D'Amato CJ, Penney JB, Young AB (1988) Differential loss  
845 of striatal projection neurons in Huntington disease. *Proc Natl Acad Sci U S A* 85:5733–  
846 5737.
- 847 Sauerbrei BA, Guo J-Z, Cohen JD, Mischiati M, Guo W, Kabra M, Verma N, Mensh B, Branson  
848 K, Hantman AW (2020) Cortical pattern generation during dexterous movement is input-  
849 driven. *Nature* 577:386–391.
- 850 Sepers MD, Mackay JP, Koch E, Xiao D, Mohajerani MH, Chan AW, Smith-Dijak AI, Ramandi  
851 D, Murphy TH, Raymond LA (2021) Altered cortical processing of sensory input in  
852 Huntington disease mouse models. *bioRxiv:2021.07.18.452688* Available at:



- 853 <https://www.biorxiv.org/content/10.1101/2021.07.18.452688> [Accessed March 19, 2022].
- 854 Shabbott B, Ravindran R, Schumacher JW, Wasserman PB, Marder KS, Mazzoni P (2013)
- 855 Learning fast accurate movements requires intact frontostriatal circuits. *Front Hum*
- 856 *Neurosci* 7:752.
- 857 Silasi G, Xiao D, Vanni MP, Chen ACN, Murphy TH (2016) Intact skull chronic windows for
- 858 mesoscopic wide-field imaging in awake mice. *J Neurosci Methods* 267:141–149.
- 859 Smith, Rocha, McLean (2014) Progressive axonal transport and synaptic protein changes
- 860 correlate with behavioral and neuropathological abnormalities in the heterozygous Q175 KI
- 861 mouse model .... *Hum Mol Genet* Available at: [https://academic.oup.com/hmg/article-](https://academic.oup.com/hmg/article-abstract/23/17/4510/736560)
- 862 [abstract/23/17/4510/736560](https://academic.oup.com/hmg/article-abstract/23/17/4510/736560).
- 863 Sofroniew NJ, Flickinger D, King J, Svoboda K (2016) A large field of view two-photon
- 864 mesoscope with subcellular resolution for in vivo imaging. *Elife* 5 Available at:
- 865 <http://dx.doi.org/10.7554/eLife.14472>.
- 866 Soma S, Yoshida J, Kato S, Takahashi Y, Nonomura S, Sugimura YK, Ríos A, Kawabata M,
- 867 Kobayashi K, Kato F, Sakai Y, Isomura Y (2019) Ipsilateral-Dominant Control of Limb
- 868 Movements in Rodent Posterior Parietal Cortex. *J Neurosci* 39:485–502.
- 869 Southwell AL, Smith-Dijak A, Kay C, Sepers M, Villanueva EB, Parsons MP, Xie Y, Anderson
- 870 L, Felczak B, Walzl S, Ko S, Cheung D, Dal Cengio L, Slama R, Petoukhov E, Raymond
- 871 LA, Hayden MR (2016) An enhanced Q175 knock-in mouse model of Huntington disease
- 872 with higher mutant huntingtin levels and accelerated disease phenotypes. *Hum Mol Genet*

- 873 25:3654–3675.
- 874 Steinmetz NA, Zatka-Haas P, Carandini M, Harris KD (2019) Distributed coding of choice,  
875 action and engagement across the mouse brain. *Nature* 576:266–273.
- 876 Vanni MP, Chan AW, Balbi M, Silasi G, Murphy TH (2017) Mesoscale Mapping of Mouse  
877 Cortex Reveals Frequency-Dependent Cycling between Distinct Macroscale Functional  
878 Modules. *J Neurosci* 37:7513–7533.
- 879 Vanni MP, Murphy TH (2014) Mesoscale transcranial spontaneous activity mapping in GCaMP3  
880 transgenic mice reveals extensive reciprocal connections between areas of somatomotor  
881 cortex. *J Neurosci* 34:15931–15946.
- 882 Wekselblatt JB, Flister ED, Piscopo DM, Niell CM (2016) Large-scale imaging of cortical  
883 dynamics during sensory perception and behavior. *J Neurophysiol* 115:2852–2866.
- 884 Whishaw IQ, Agha BM, Kuntz JR, Qandeel, Faraji J, Mohajerani MH (2018a) Tongue  
885 protrusions modify the syntax of skilled reaching for food by the mouse: Evidence for  
886 flexibility in action selection and shared hand/mouth central modulation of action.  
887 *Behavioural Brain Research* 341:37–44 Available at:  
888 <http://dx.doi.org/10.1016/j.bbr.2017.12.006>.
- 889 Whishaw IQ, Faraji J, Agha BM, Kuntz JR, Metz GAS, Mohajerani MH (2018b) A mouse's  
890 spontaneous eating repertoire aids performance on laboratory skilled reaching tasks: A  
891 motoric example of instinctual drift with an ethological description of the withdraw  
892 movements in freely-moving and head-fixed mice. *Behavioural Brain Research* 337:80–90

- 893 Available at: <http://dx.doi.org/10.1016/j.bbr.2017.09.044>.
- 894 Whishaw IQ, Pellis SM, Gorny BP (1992) Skilled reaching in rats and humans: evidence for  
895 parallel development or homology. *Behav Brain Res* 47:59–70.
- 896 Woodard CL, Bolaños F, Boyd JD, Silasi G, Murphy TH, Raymond LA (2017) An Automated  
897 Home-Cage System to Assess Learning and Performance of a Skilled Motor Task in a  
898 Mouse Model of Huntington’s Disease. *eneuro* 4:ENEURO.0141–17.2017 Available at:  
899 <http://dx.doi.org/10.1523/eneuro.0141-17.2017>.
- 900 Woodard CL, Sepers MD, Raymond LA (2021) Impaired Refinement of Kinematic Variability  
901 in Huntington Disease Mice on an Automated Home Cage Forelimb Motor Task. *J Neurosci*  
902 41:8589–8602.
- 903 Xiao D, Forys BJ, Vanni MP, Murphy TH (2021) MesoNet allows automated scaling and  
904 segmentation of mouse mesoscale cortical maps using machine learning. *Nat Commun*  
905 12:5992.
- 906 Xiao D, Vanni MP, Mitelut CC, Chan AW, LeDue JM, Xie Y, Chen AC, Swindale NV, Murphy  
907 TH (2017) Mapping cortical mesoscopic networks of single spiking cortical or sub-cortical  
908 neurons. *Elife* 6 Available at: <http://dx.doi.org/10.7554/eLife.19976>.

# Figure 1

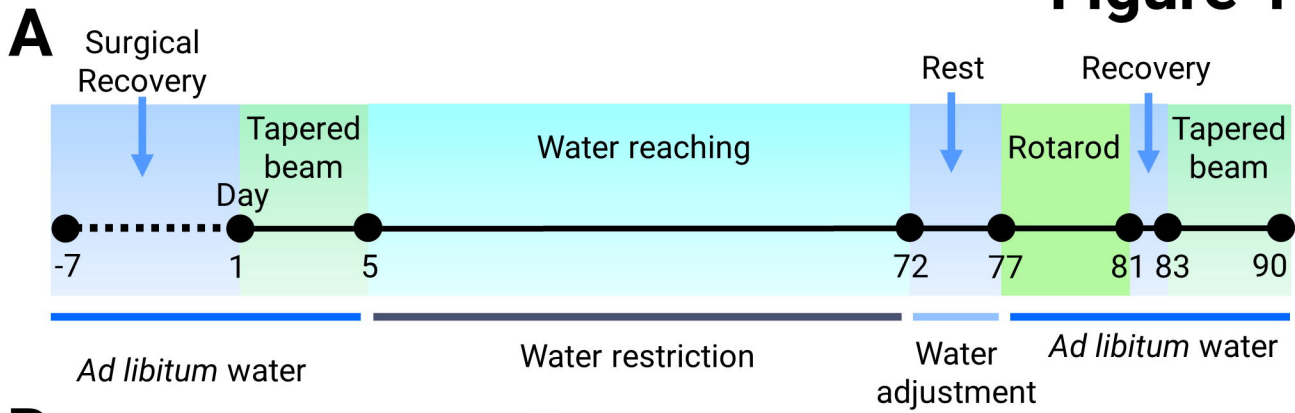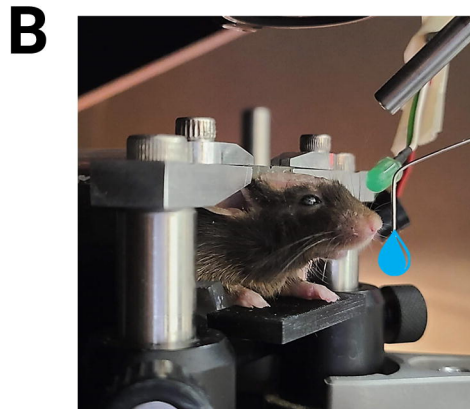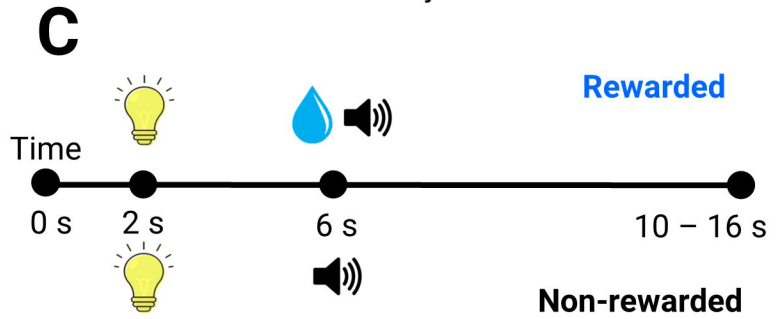

**Figure 2**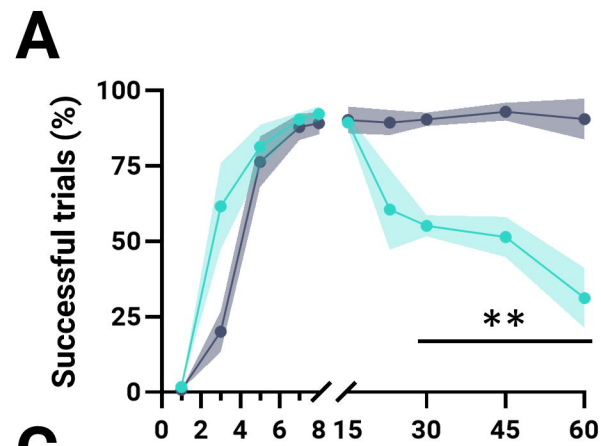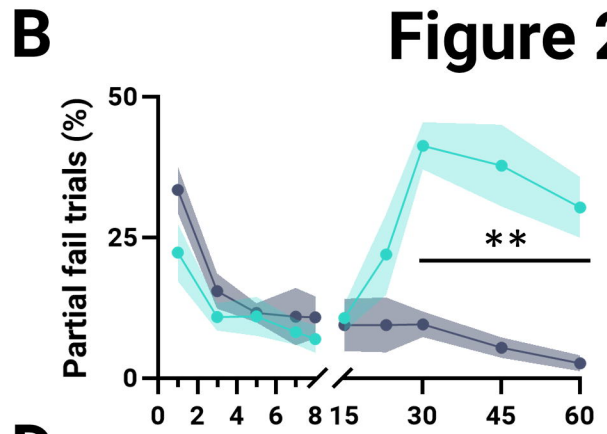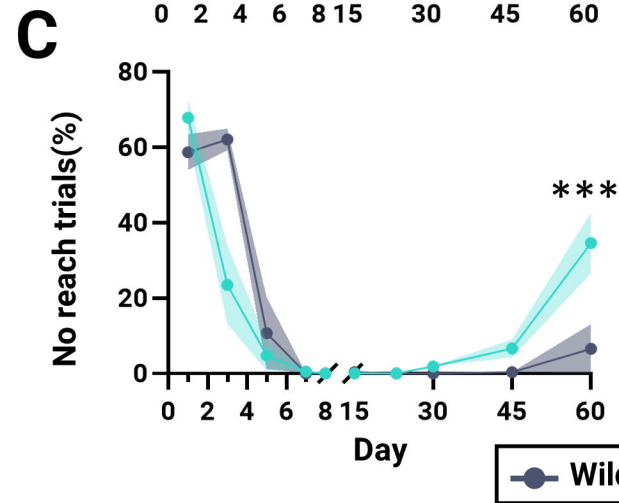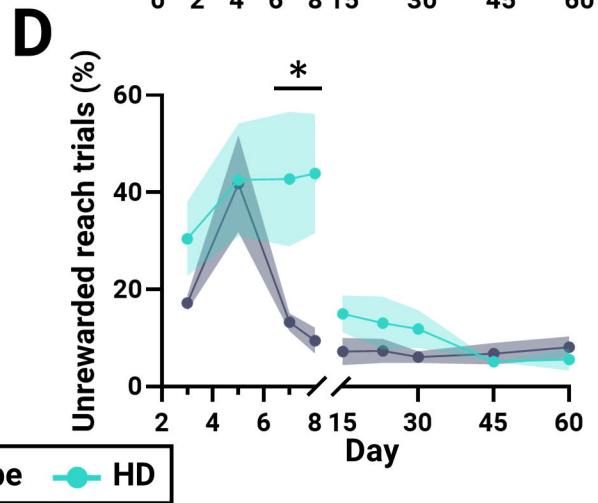

# Figure 3

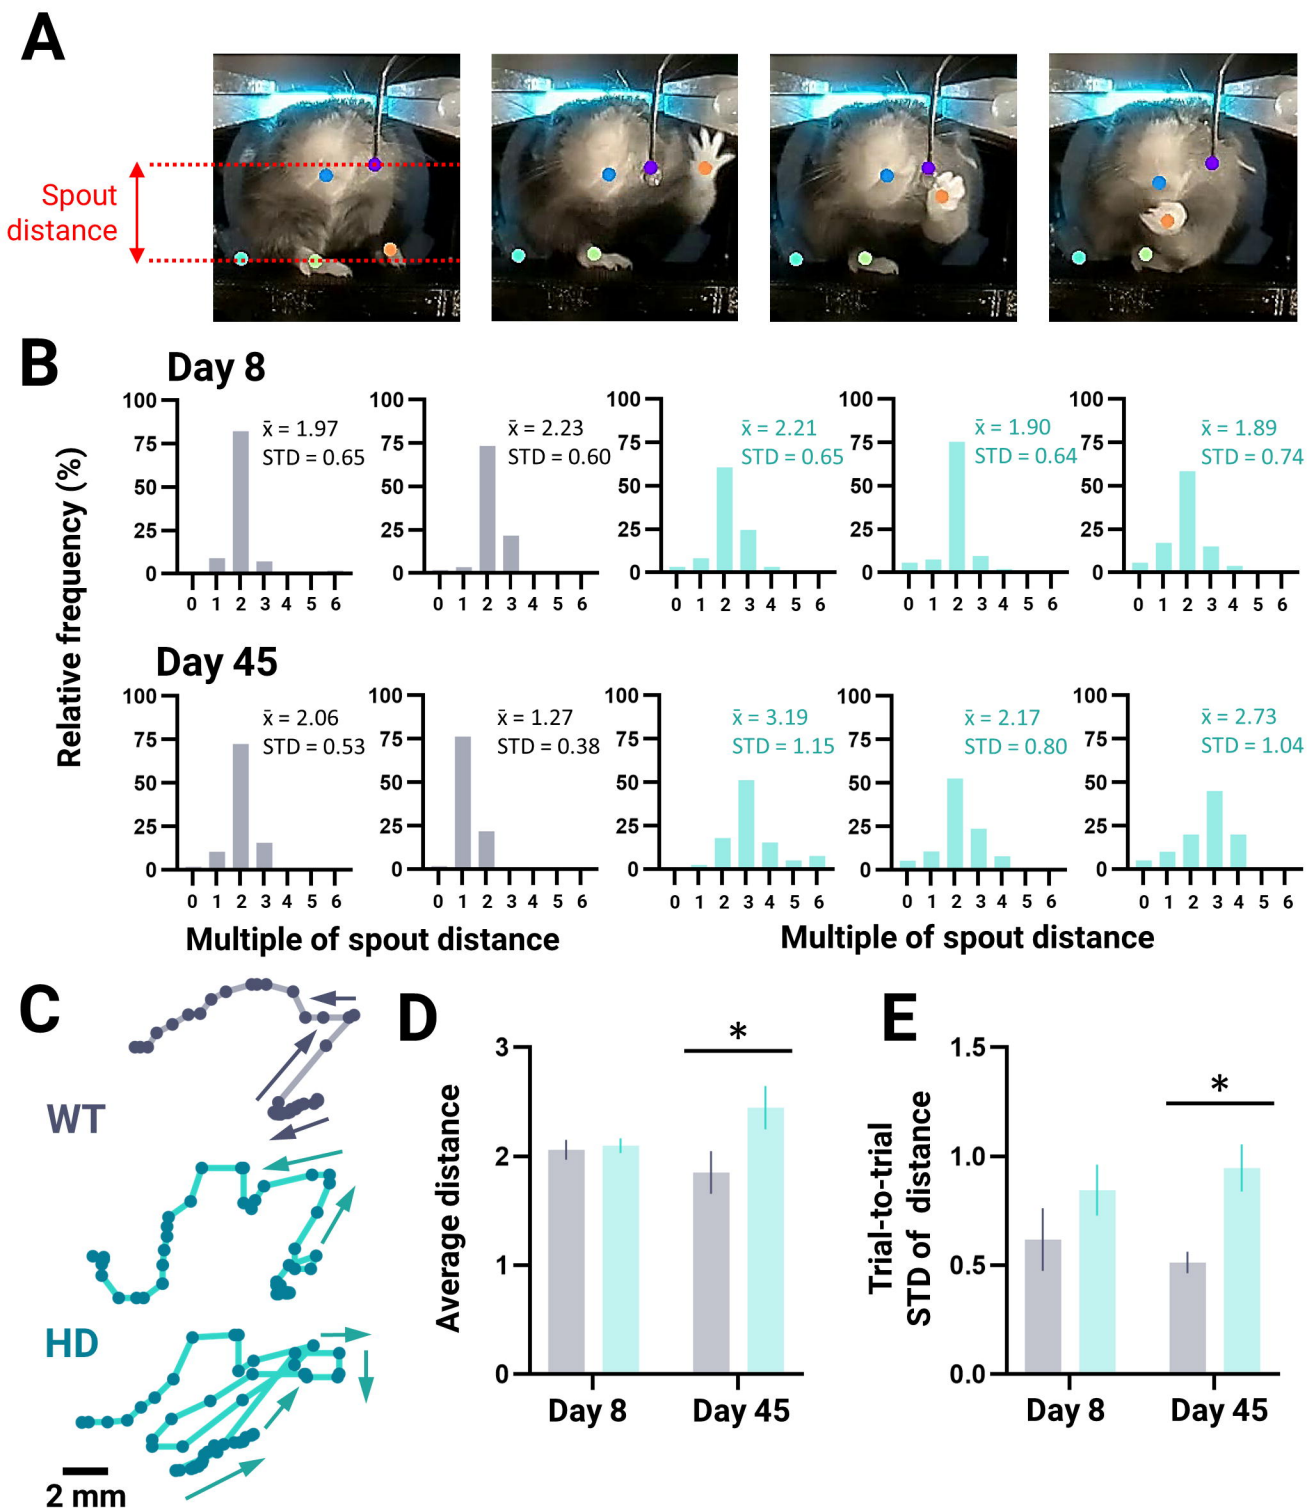

# Figure 4

## A

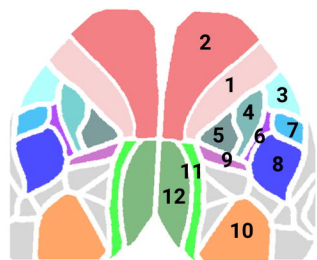

- |          |            |
|----------|------------|
| 1. M1    | 7. sspn    |
| 2. M2    | 8. sspbfd  |
| 3. sspm  | 9. sspr    |
| 4. sspfl | 10. visp   |
| 5. ssphl | 11. rspagl |
| 6. sspun | 12. rspd   |

## B

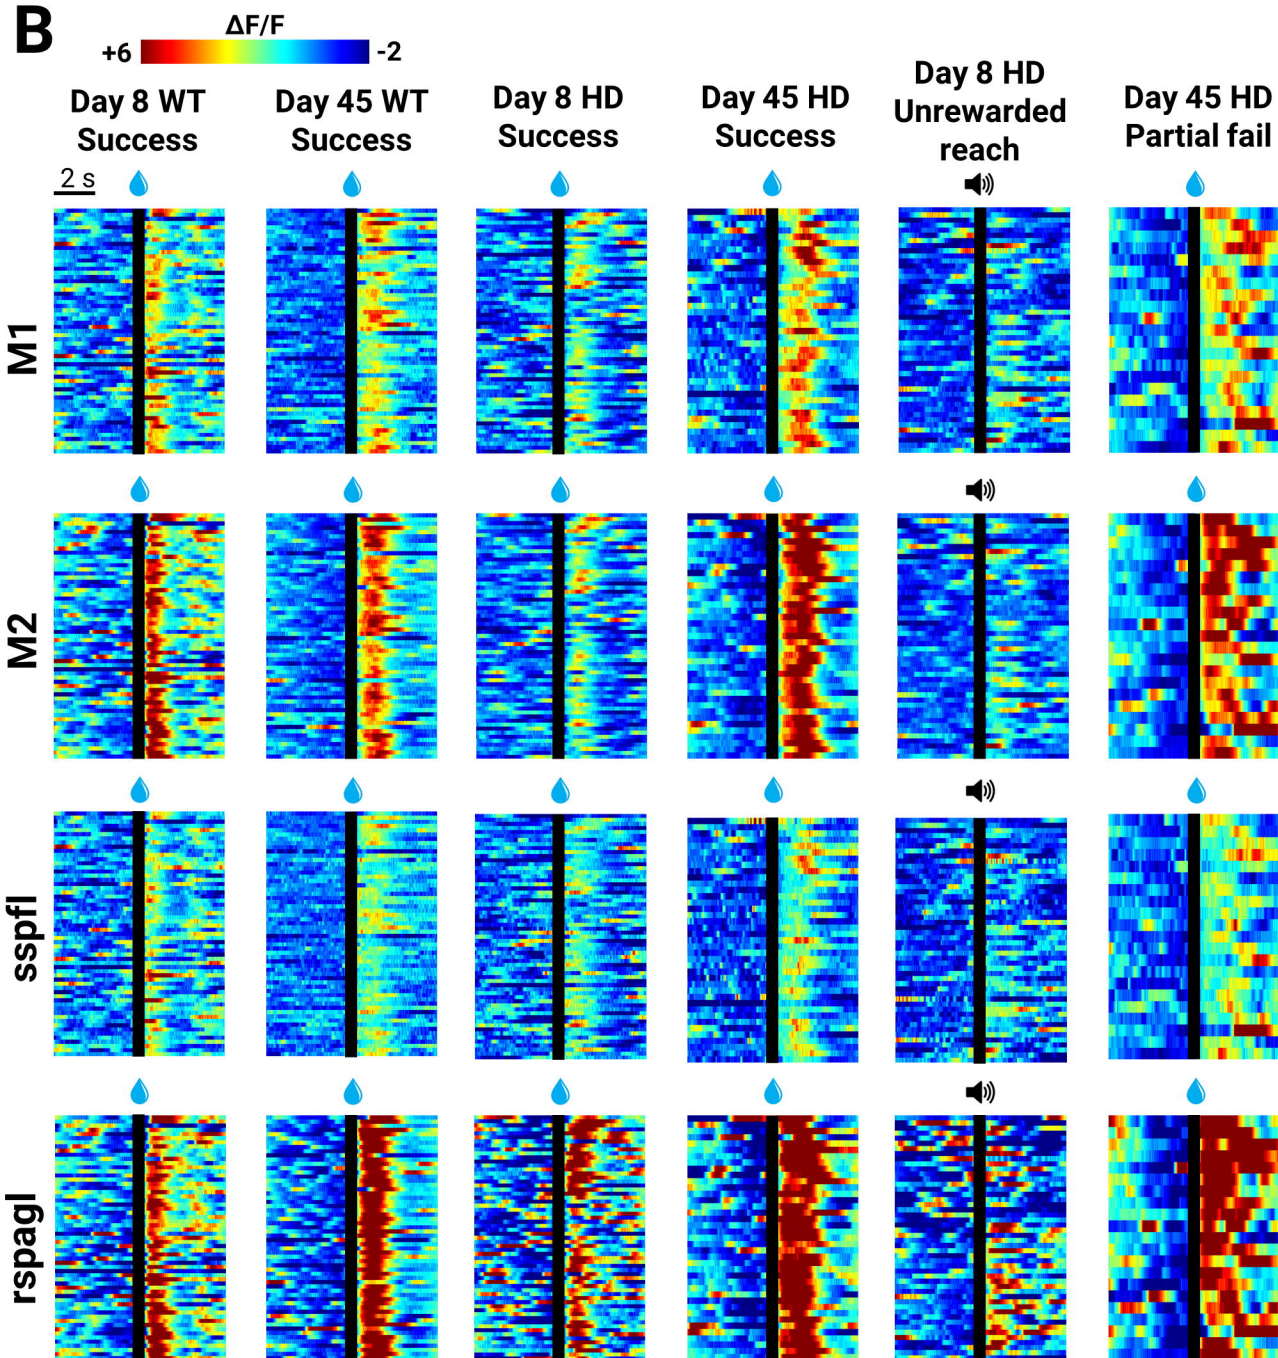

**Figure 5**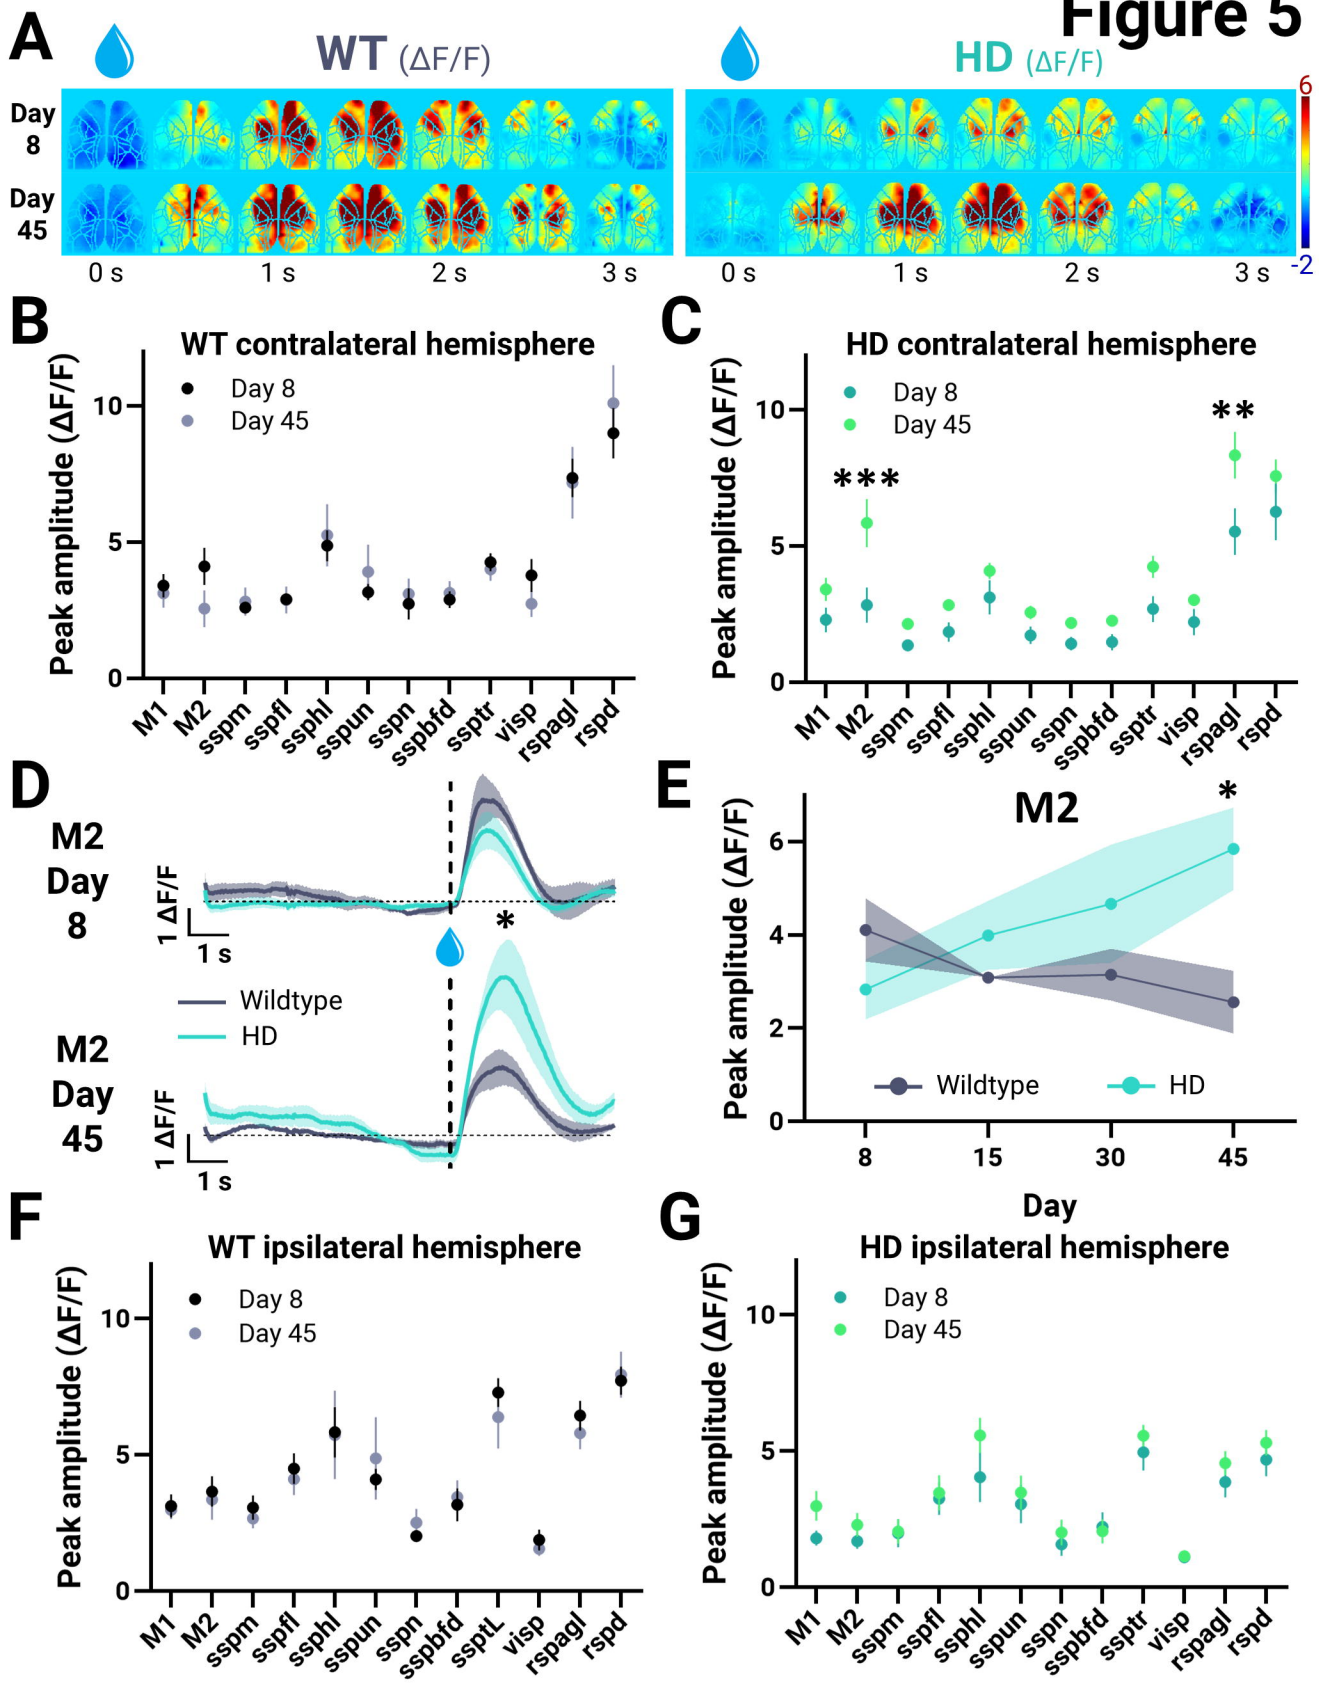



# Figure 6

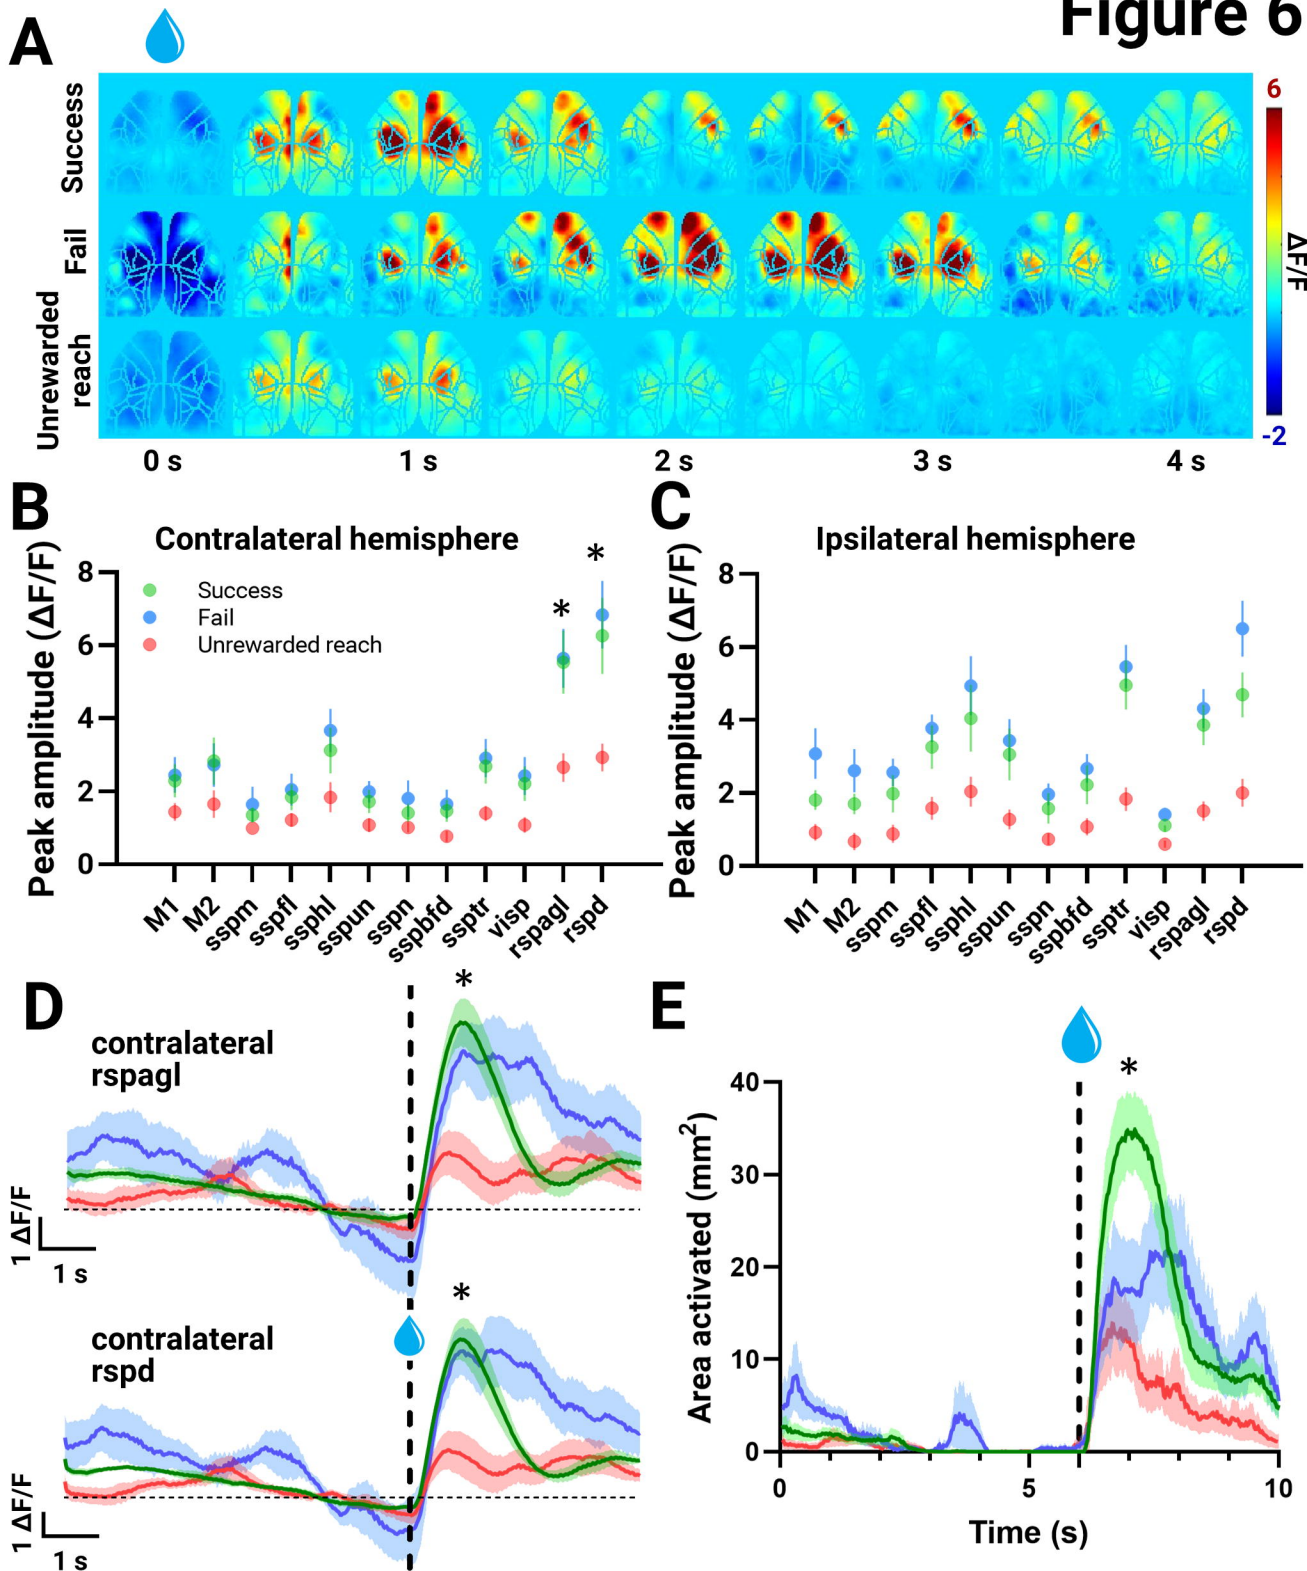

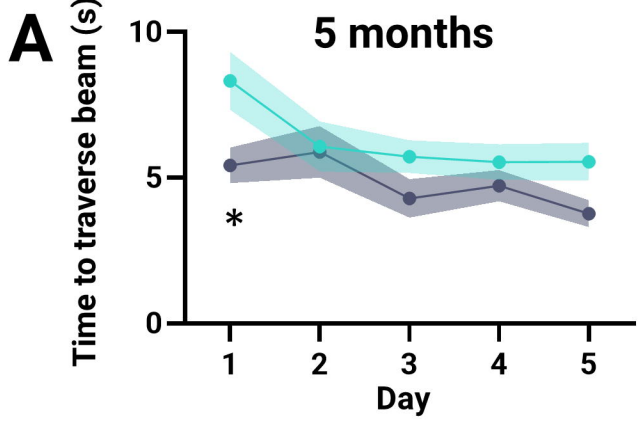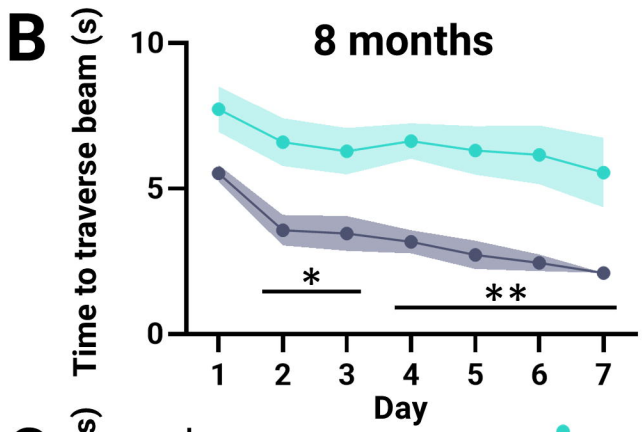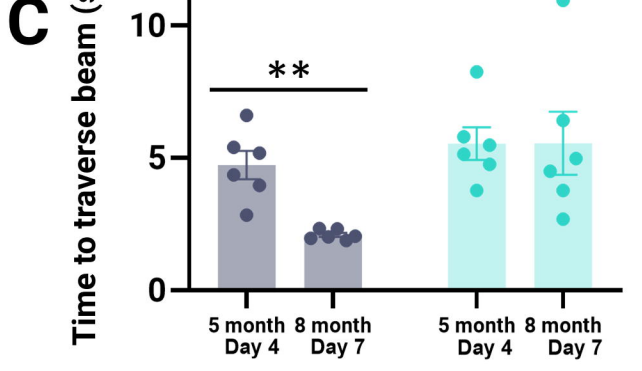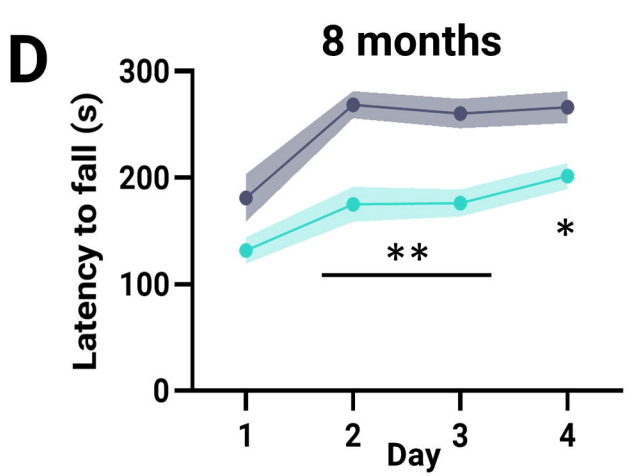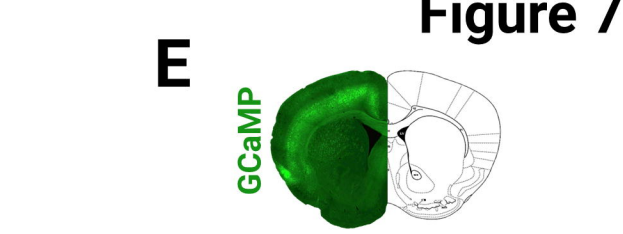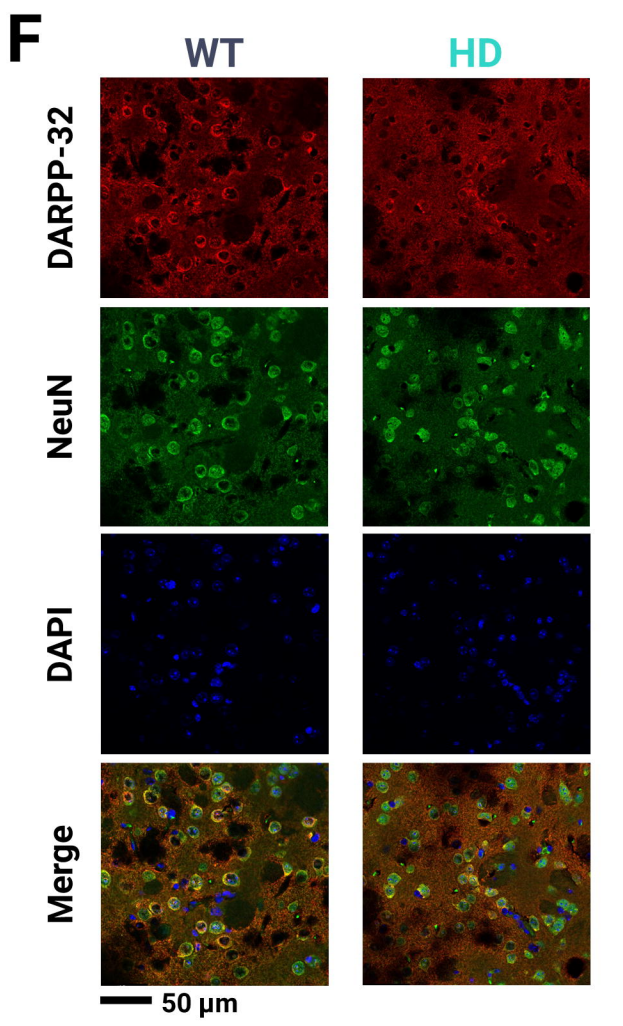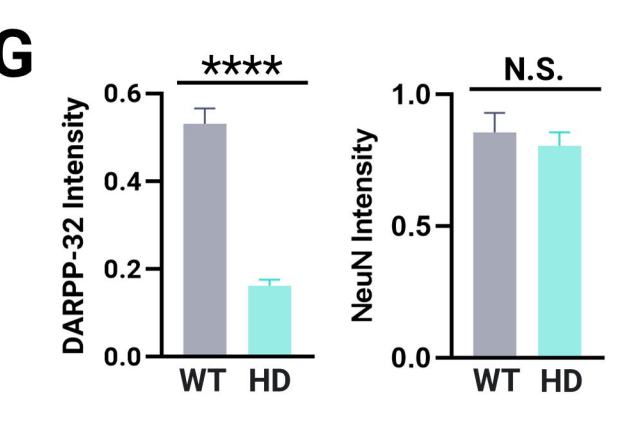

# Figure 8

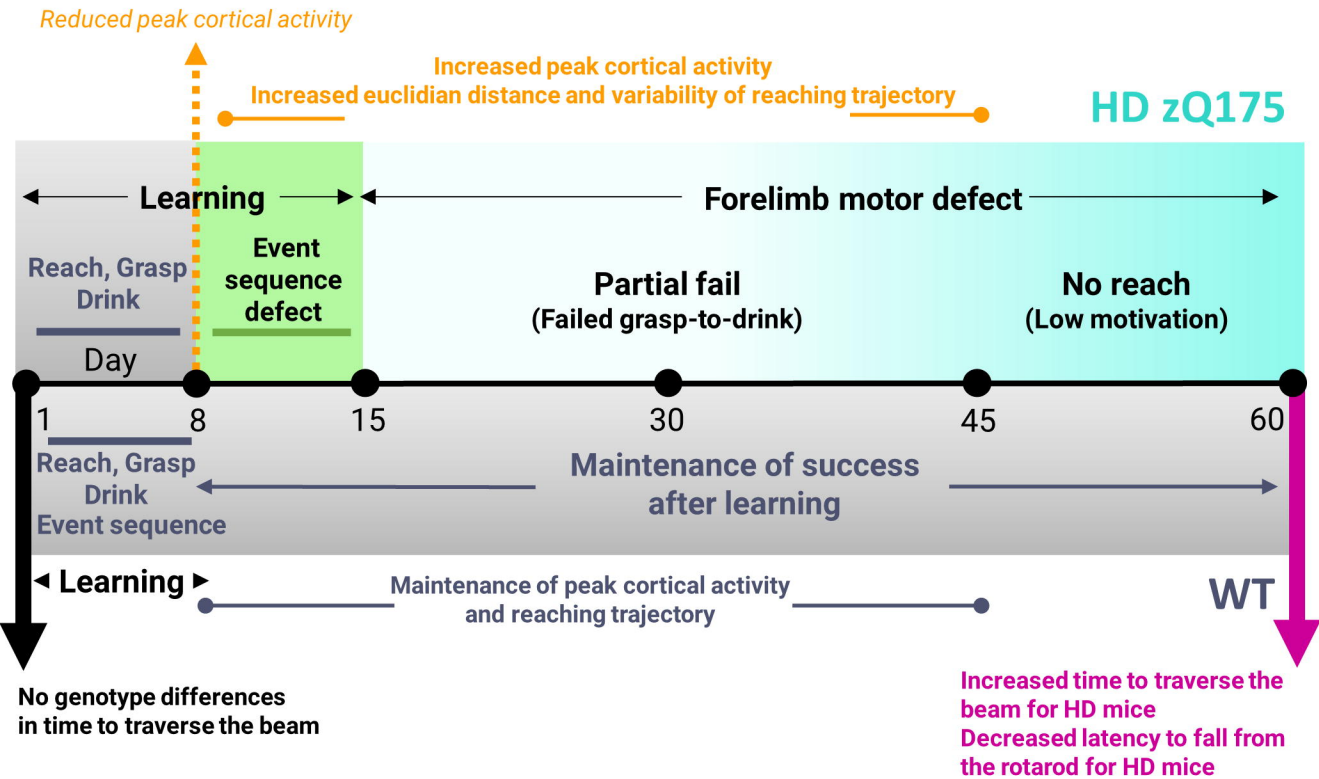

# Figure 2-1

## A

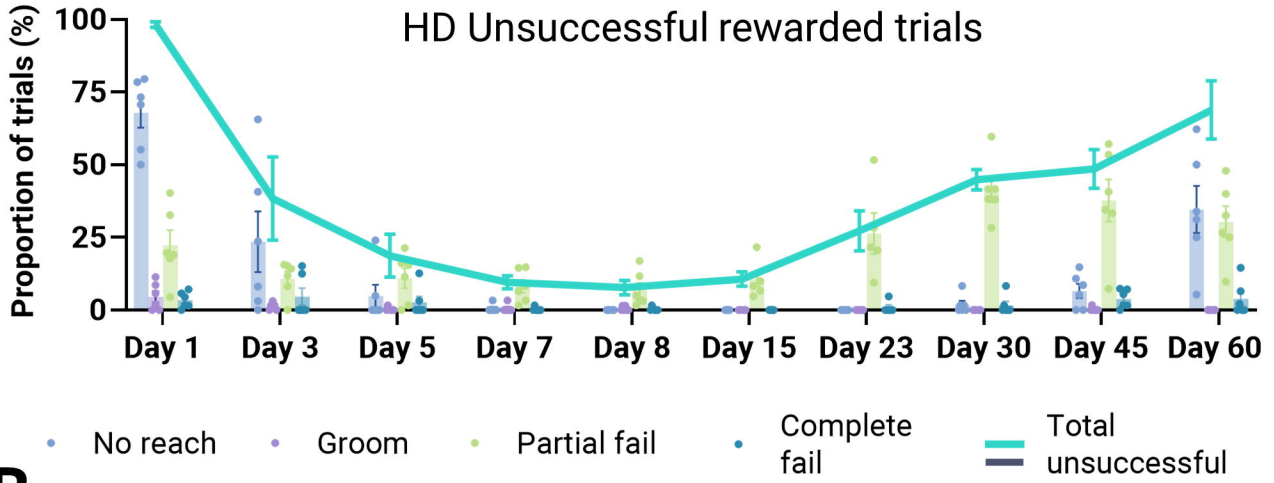

## B

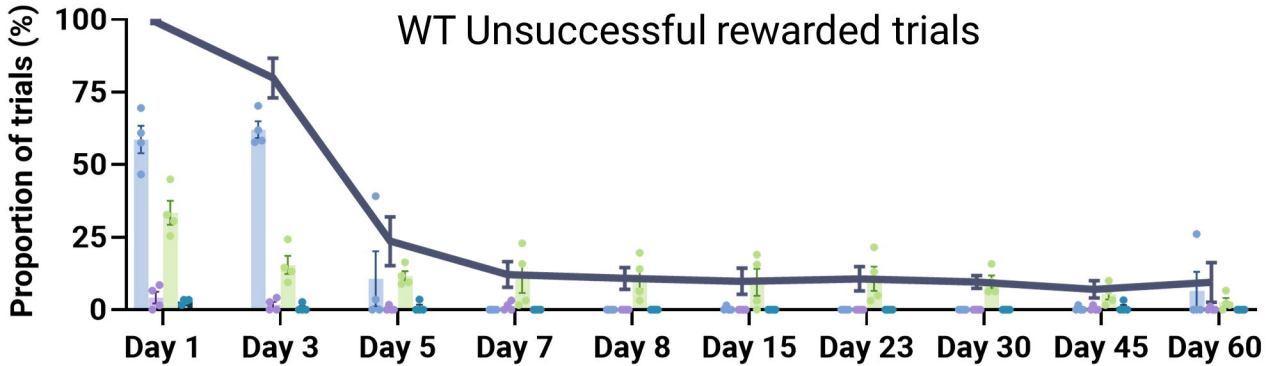

|                      |                                                                                                                                          |
|----------------------|------------------------------------------------------------------------------------------------------------------------------------------|
| <b>Partial fail</b>  | Water reward was successfully removed from the spout but was lost before drinking<br>Successful reach-to-grasp but failed grasp-to-drink |
| <b>Complete fail</b> | Left paw reaching commenced but no contact was made with the spout or water reward<br>Failed reach-to-grasp                              |

# Figure 3-1

## Day 8 WT

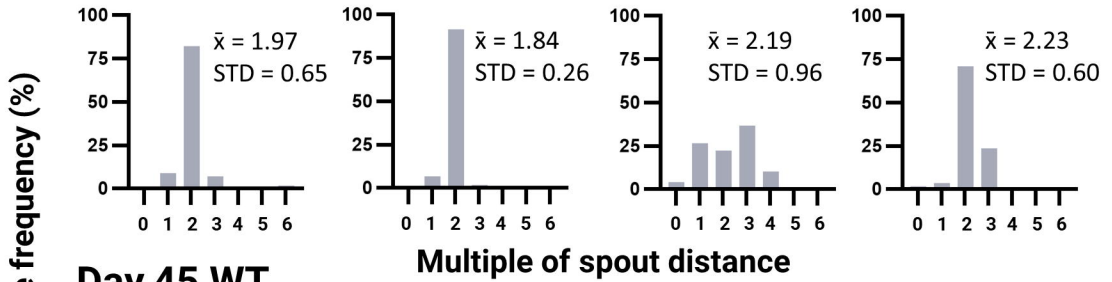

## Day 45 WT

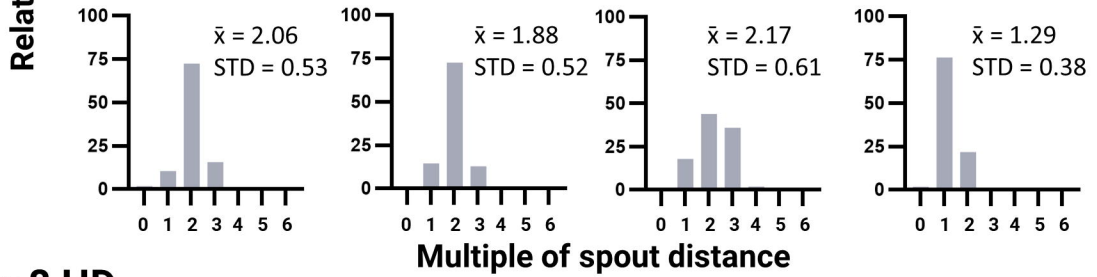

## Day 8 HD

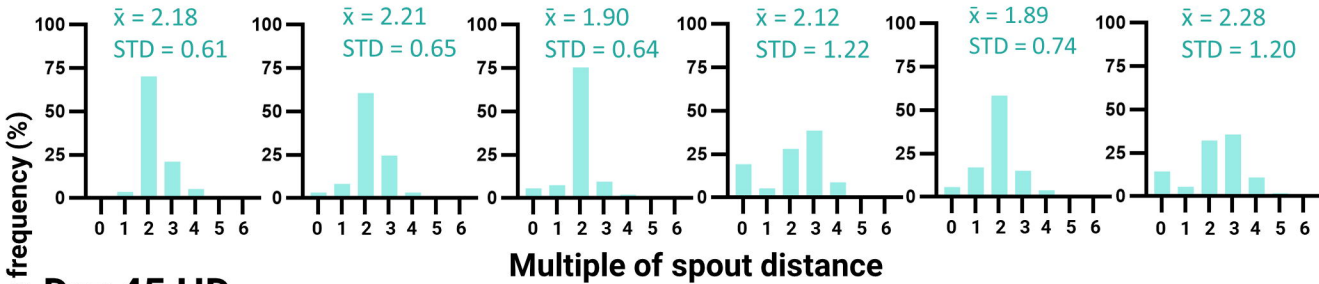

## Day 45 HD

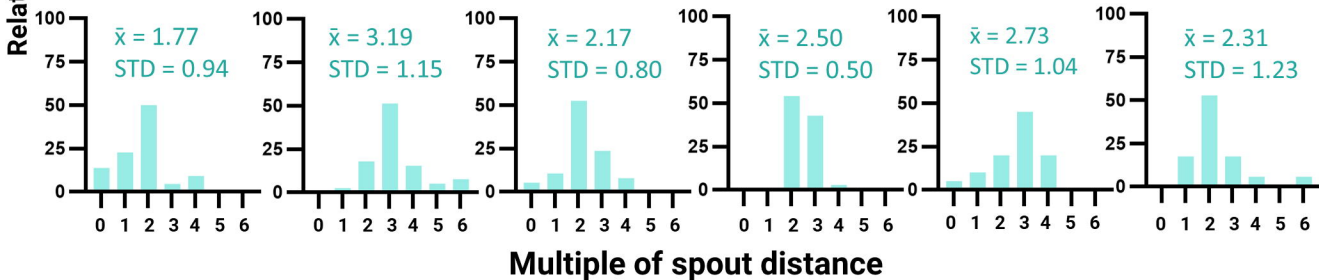

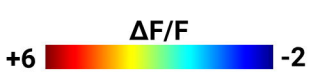

# WT Success

# Figure 4-1

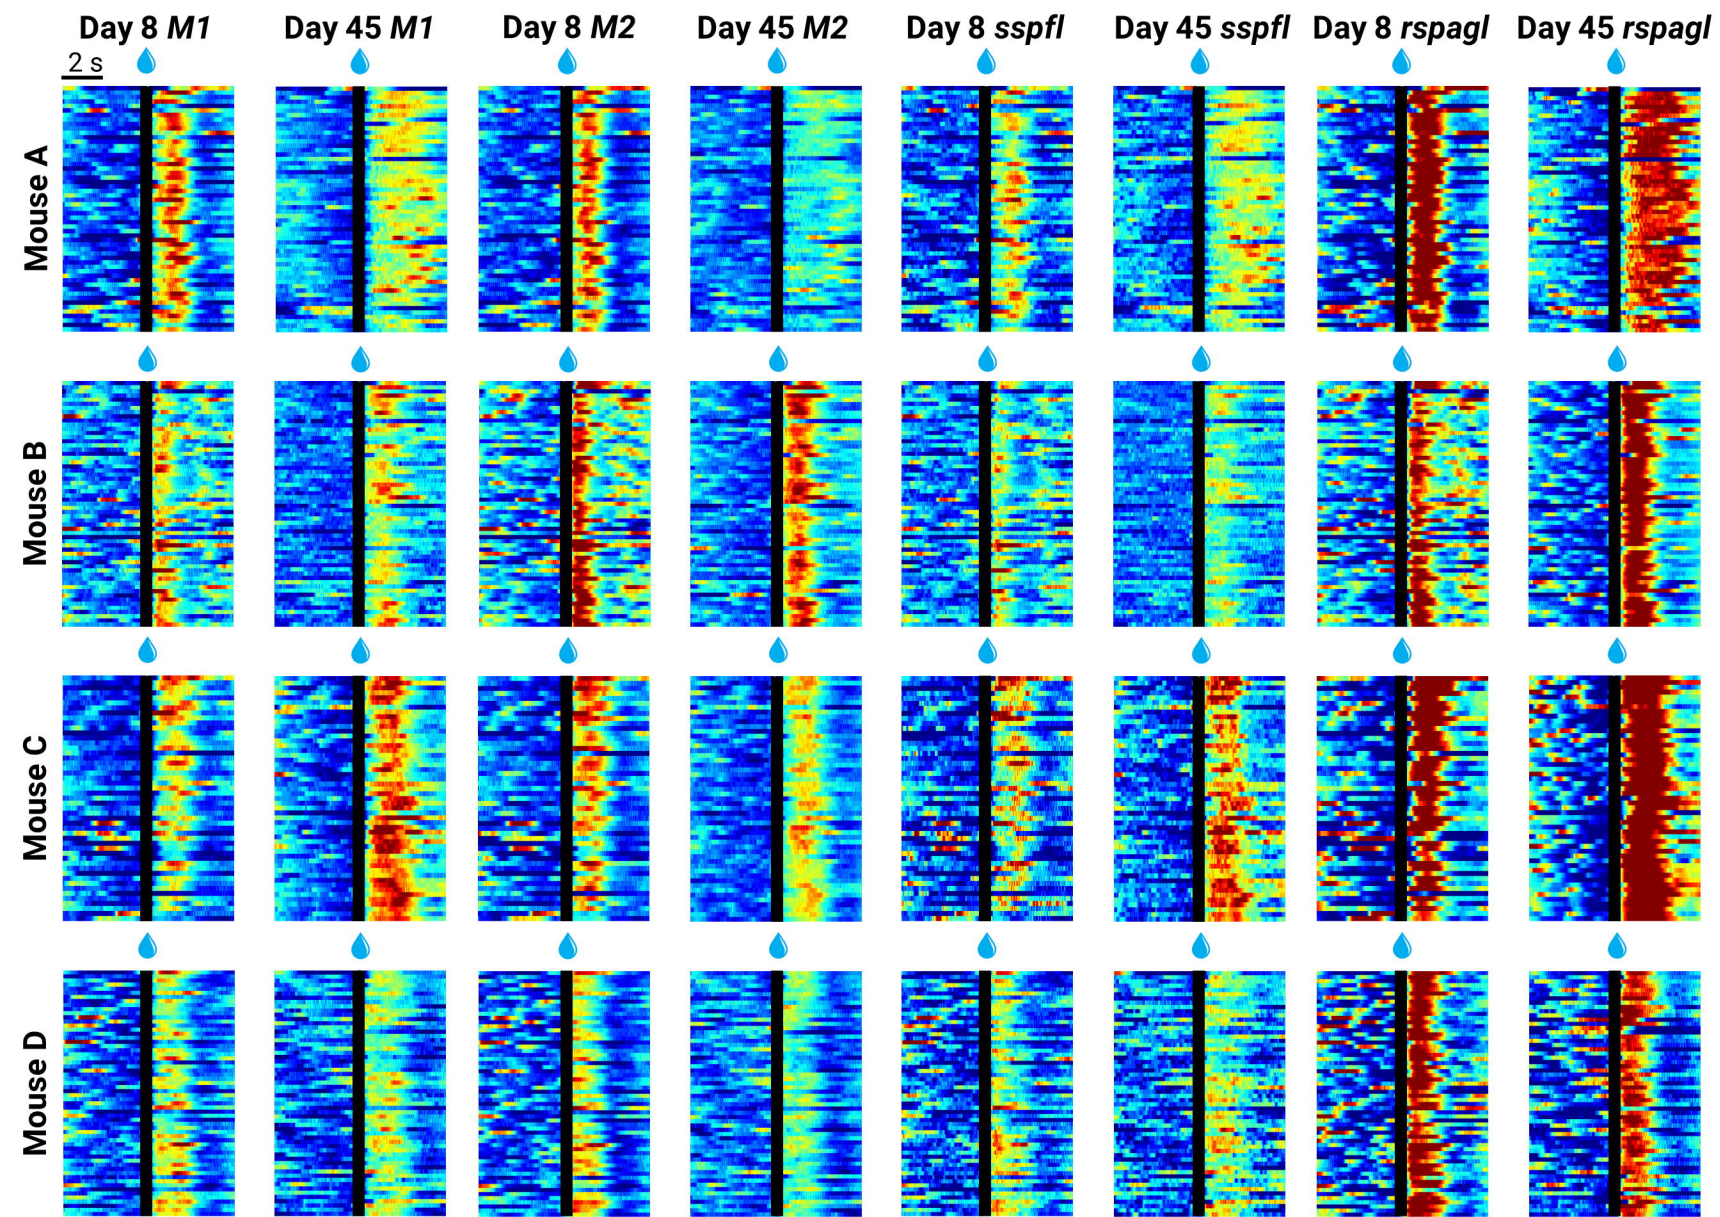

**Figure 4-2** $\Delta F/F$   
+6 -2**HD Success**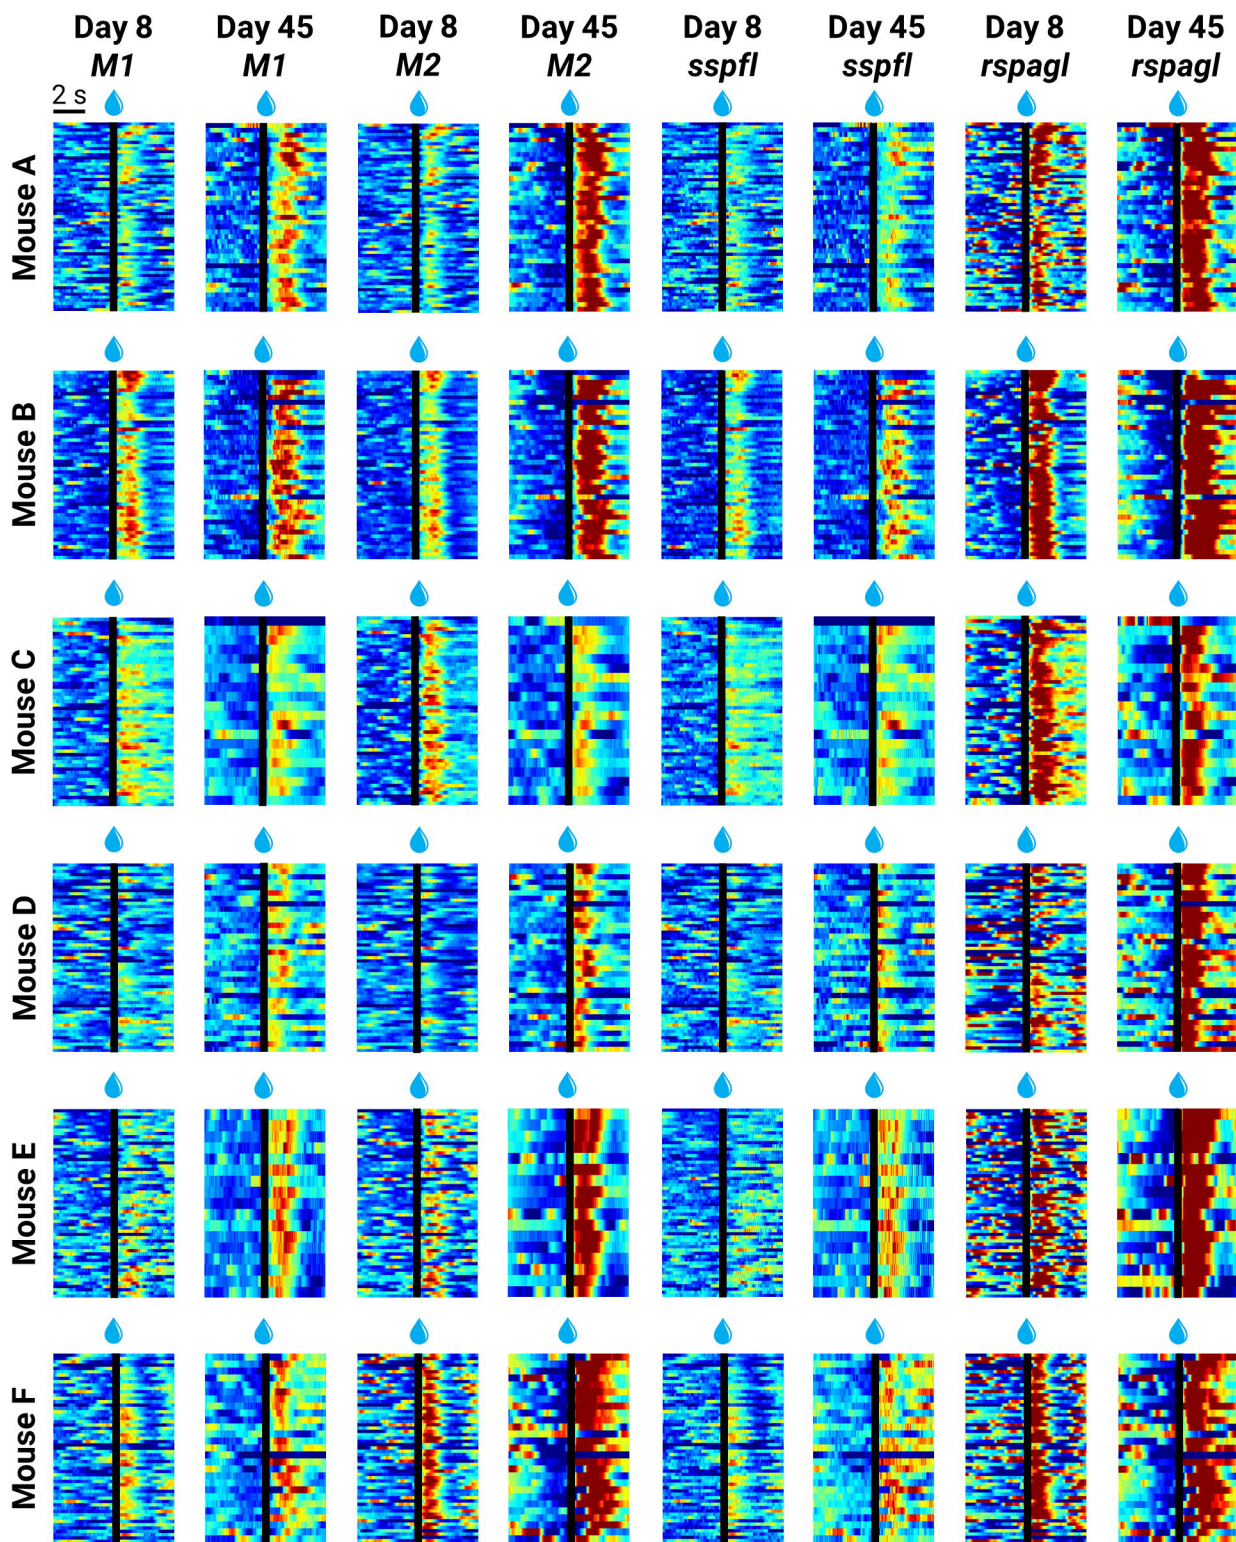

# Figure 4-3

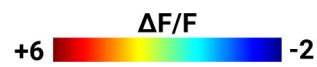

*HD Day 45 Partial fail*

*HD Day 8 Unrewarded reach*

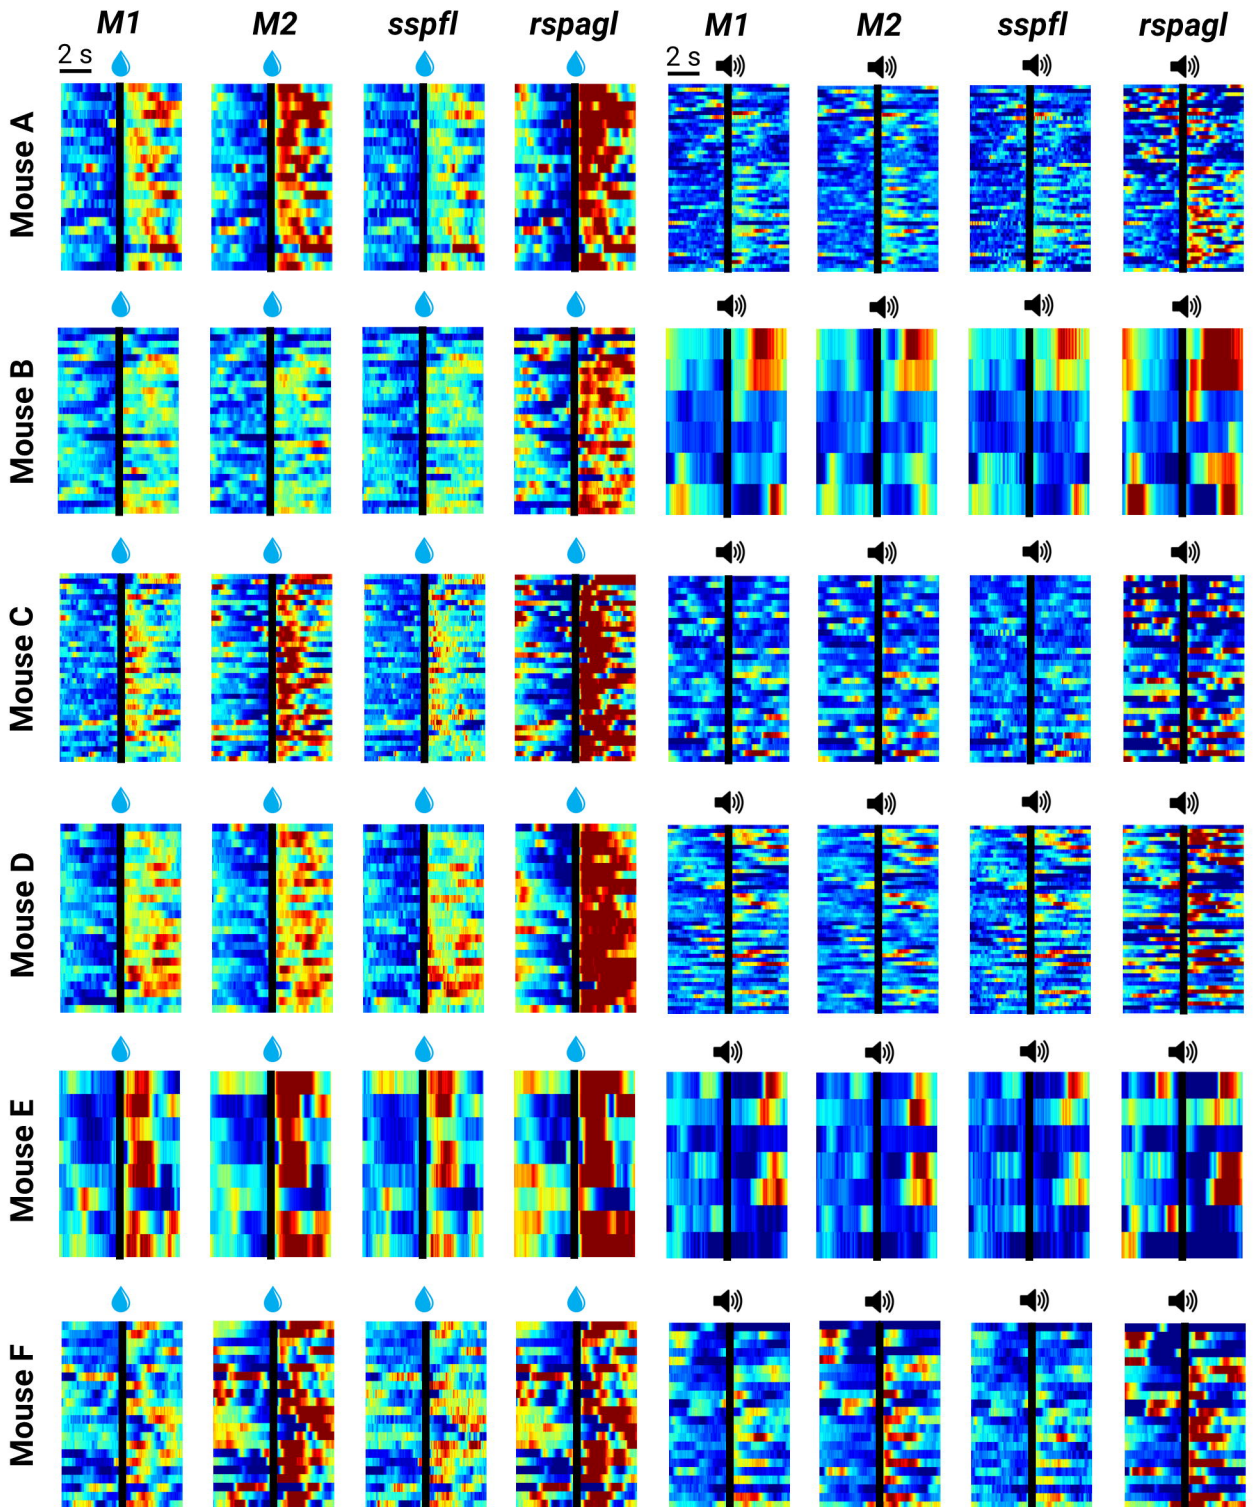



# Figure 5-1

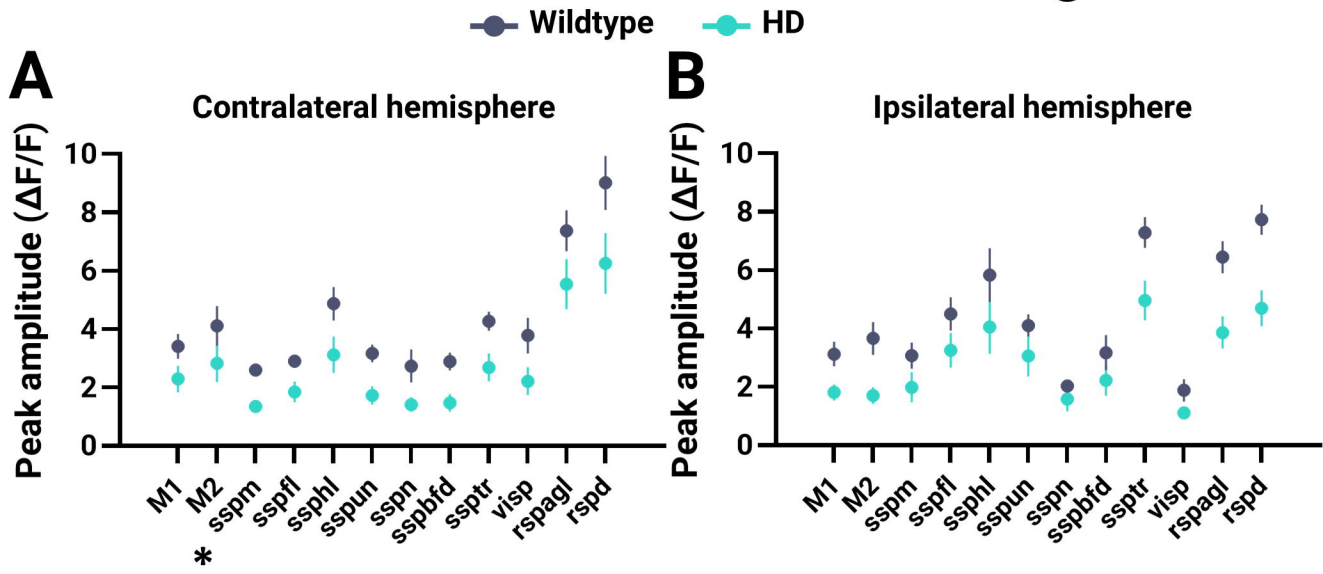

# Contralateral hemisphere

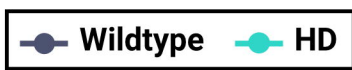

# Figure 5-2

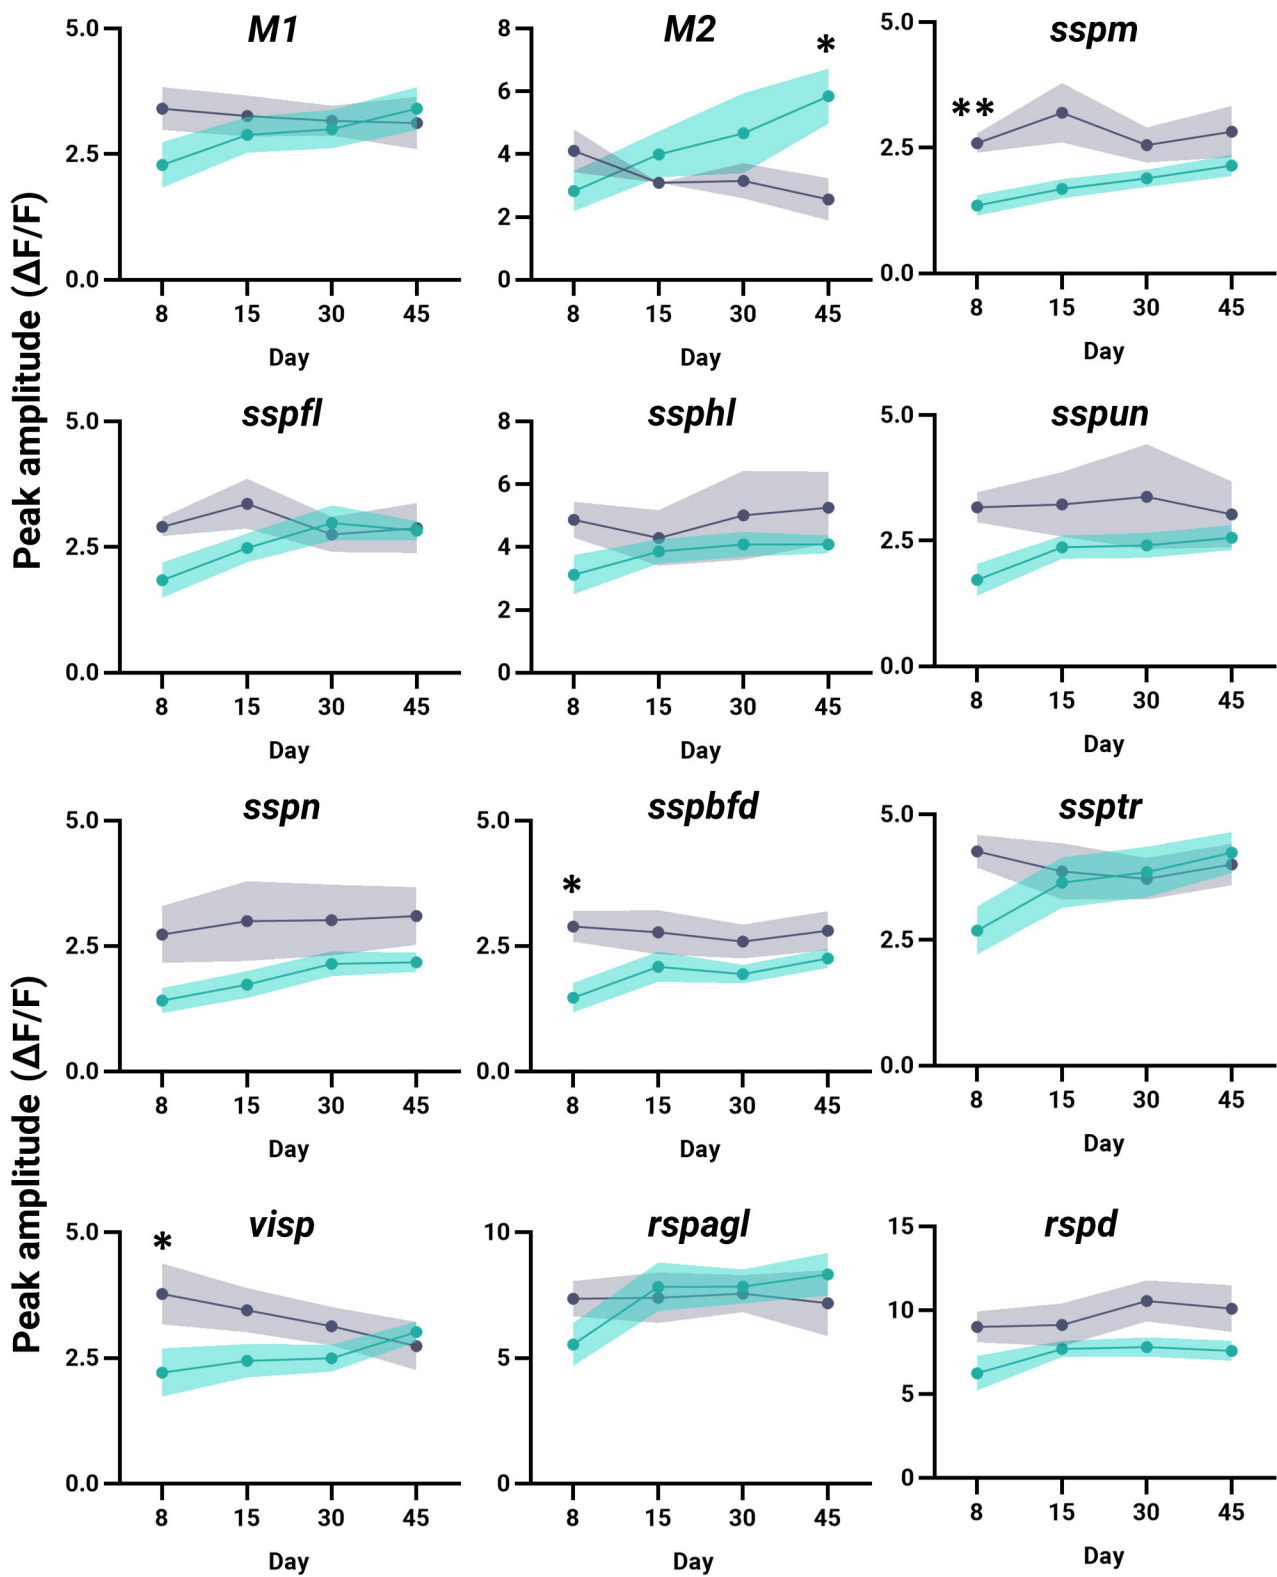

# Ipsilateral hemisphere

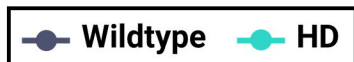

# Figure 5-3

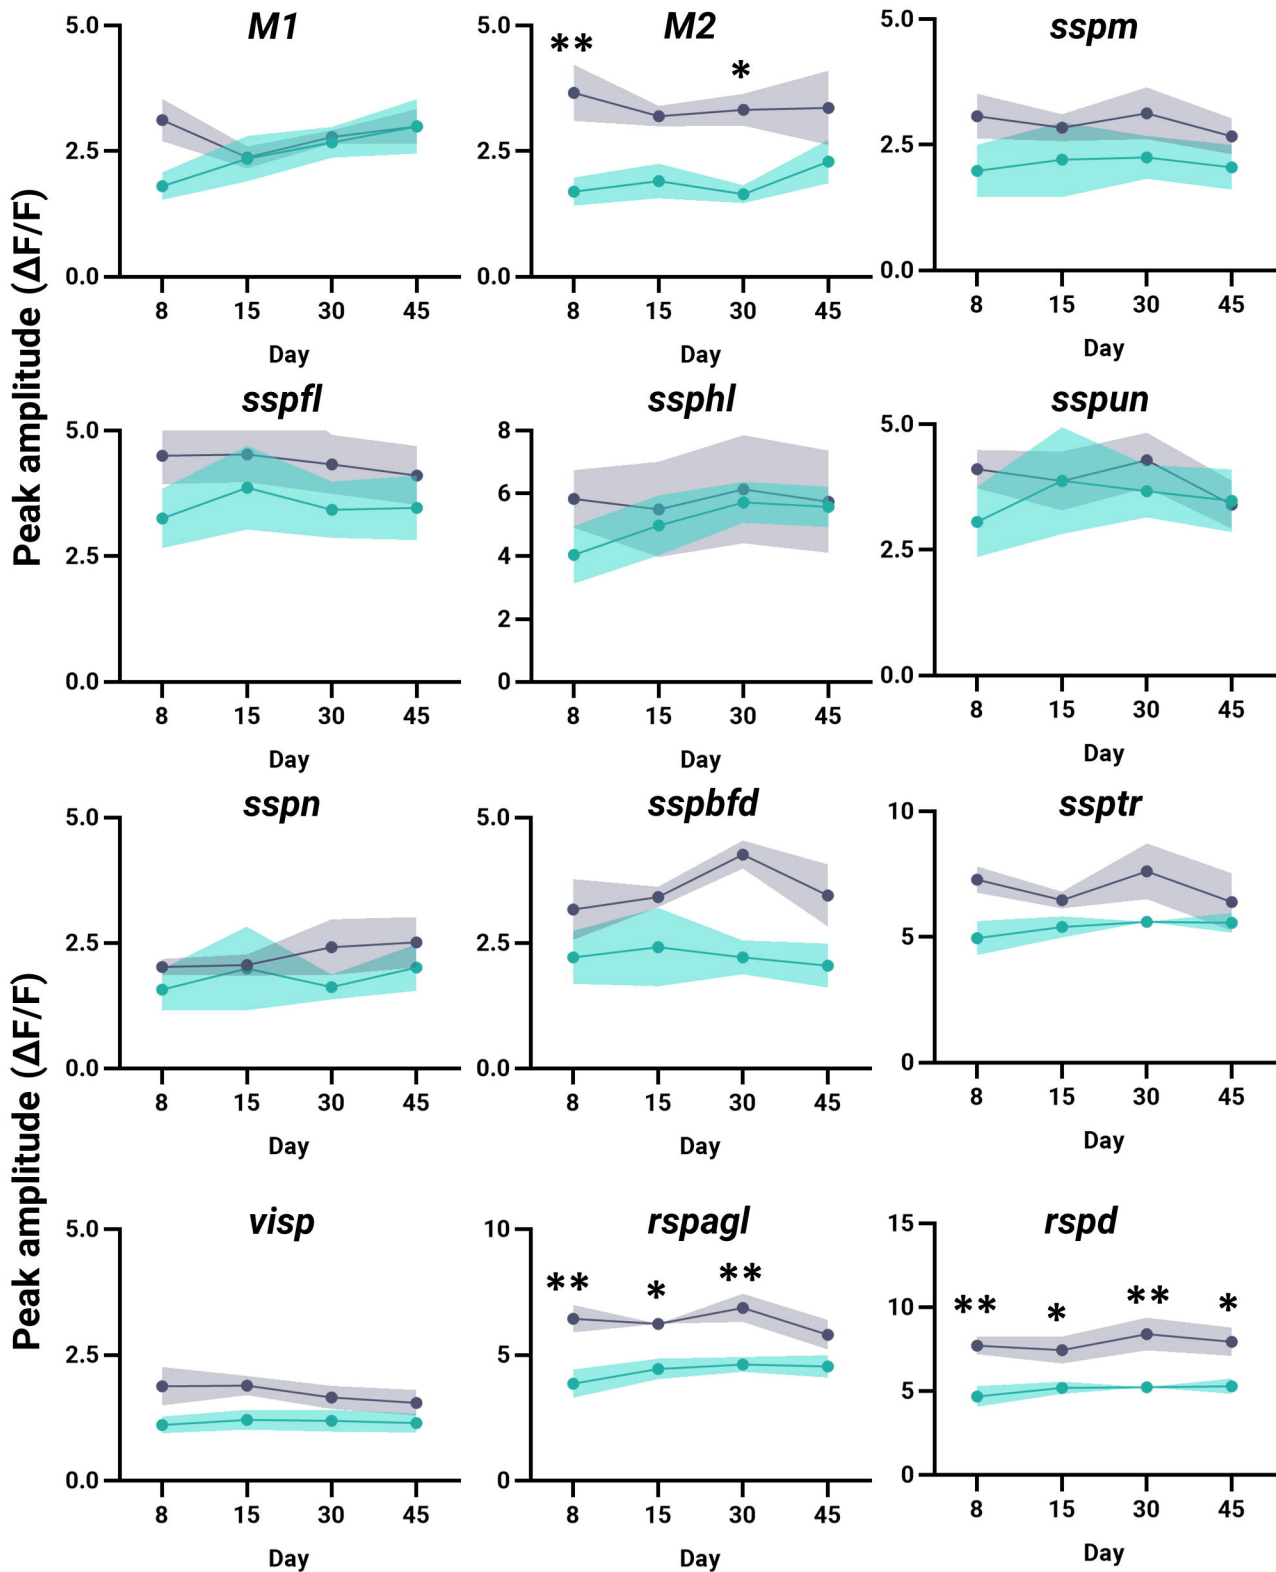

# Figure 6-1

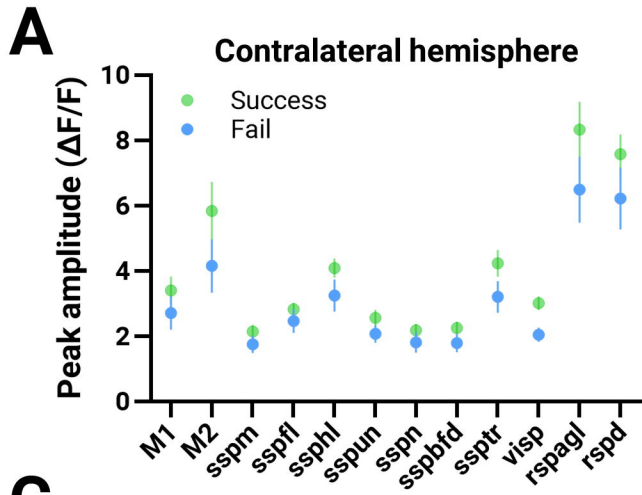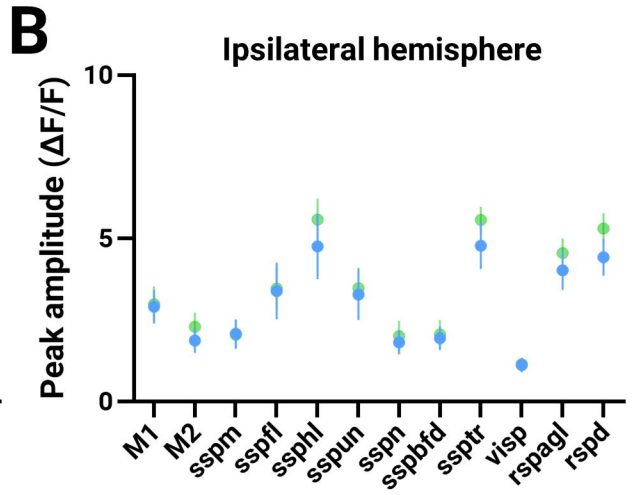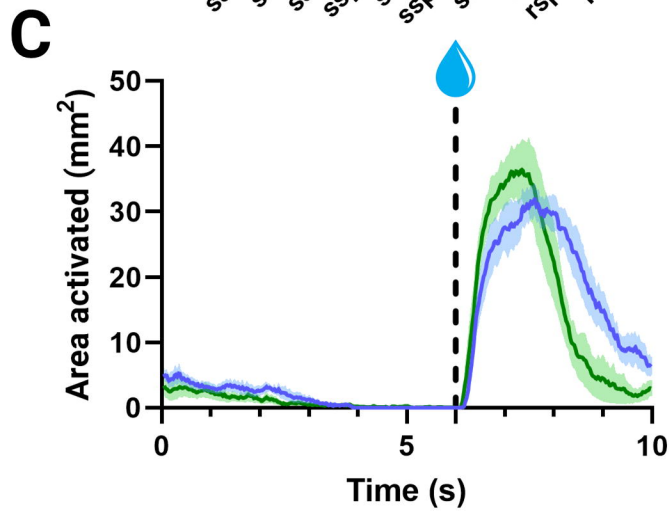

Source: https://www.biorxiv.org/content/10.1101/2022.09.02.505959v1.full.pdf
